# Supplementary material for: A single cell RNA sequencing resource for early sea urchin development
Source: Oxford University Press journal article supplement (doi:10.1242/dev.191528), 2020-08-18
Supplement: dev191528supp.pdf [file dev191528supp.pdf]

Fig. S1

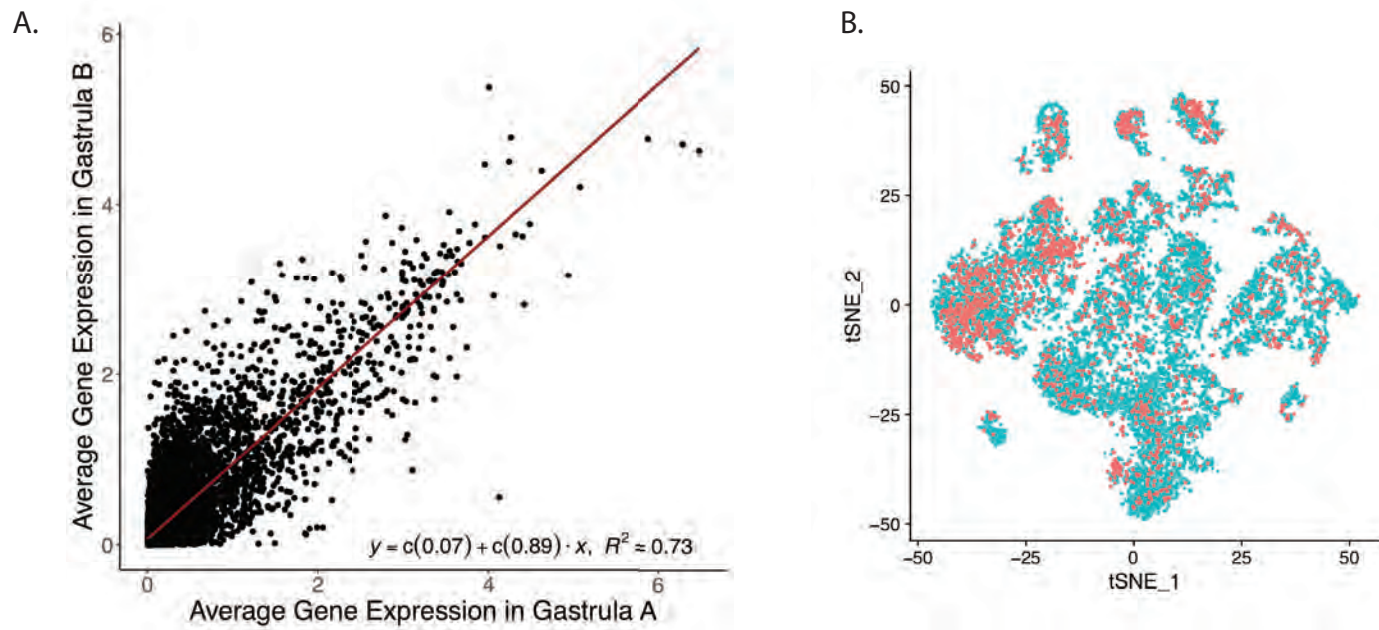

Fig. S1. (A) Comparison of average gene expression between Gastrula A, control from previous experiment (2,435 cells), and Gastrula B, corresponding time point from current analysis (12,763 cells). F-statistic: 5.837e+04 on 1 and 21088 degrees of freedom, p-value: < 2.2e-16. (B) t-SNE plot of early gastrula stage embryos after integration. In red is Gastrula A, in blue is Gastrula B. (dim:20 resolution:0.5)

Fig. S2:

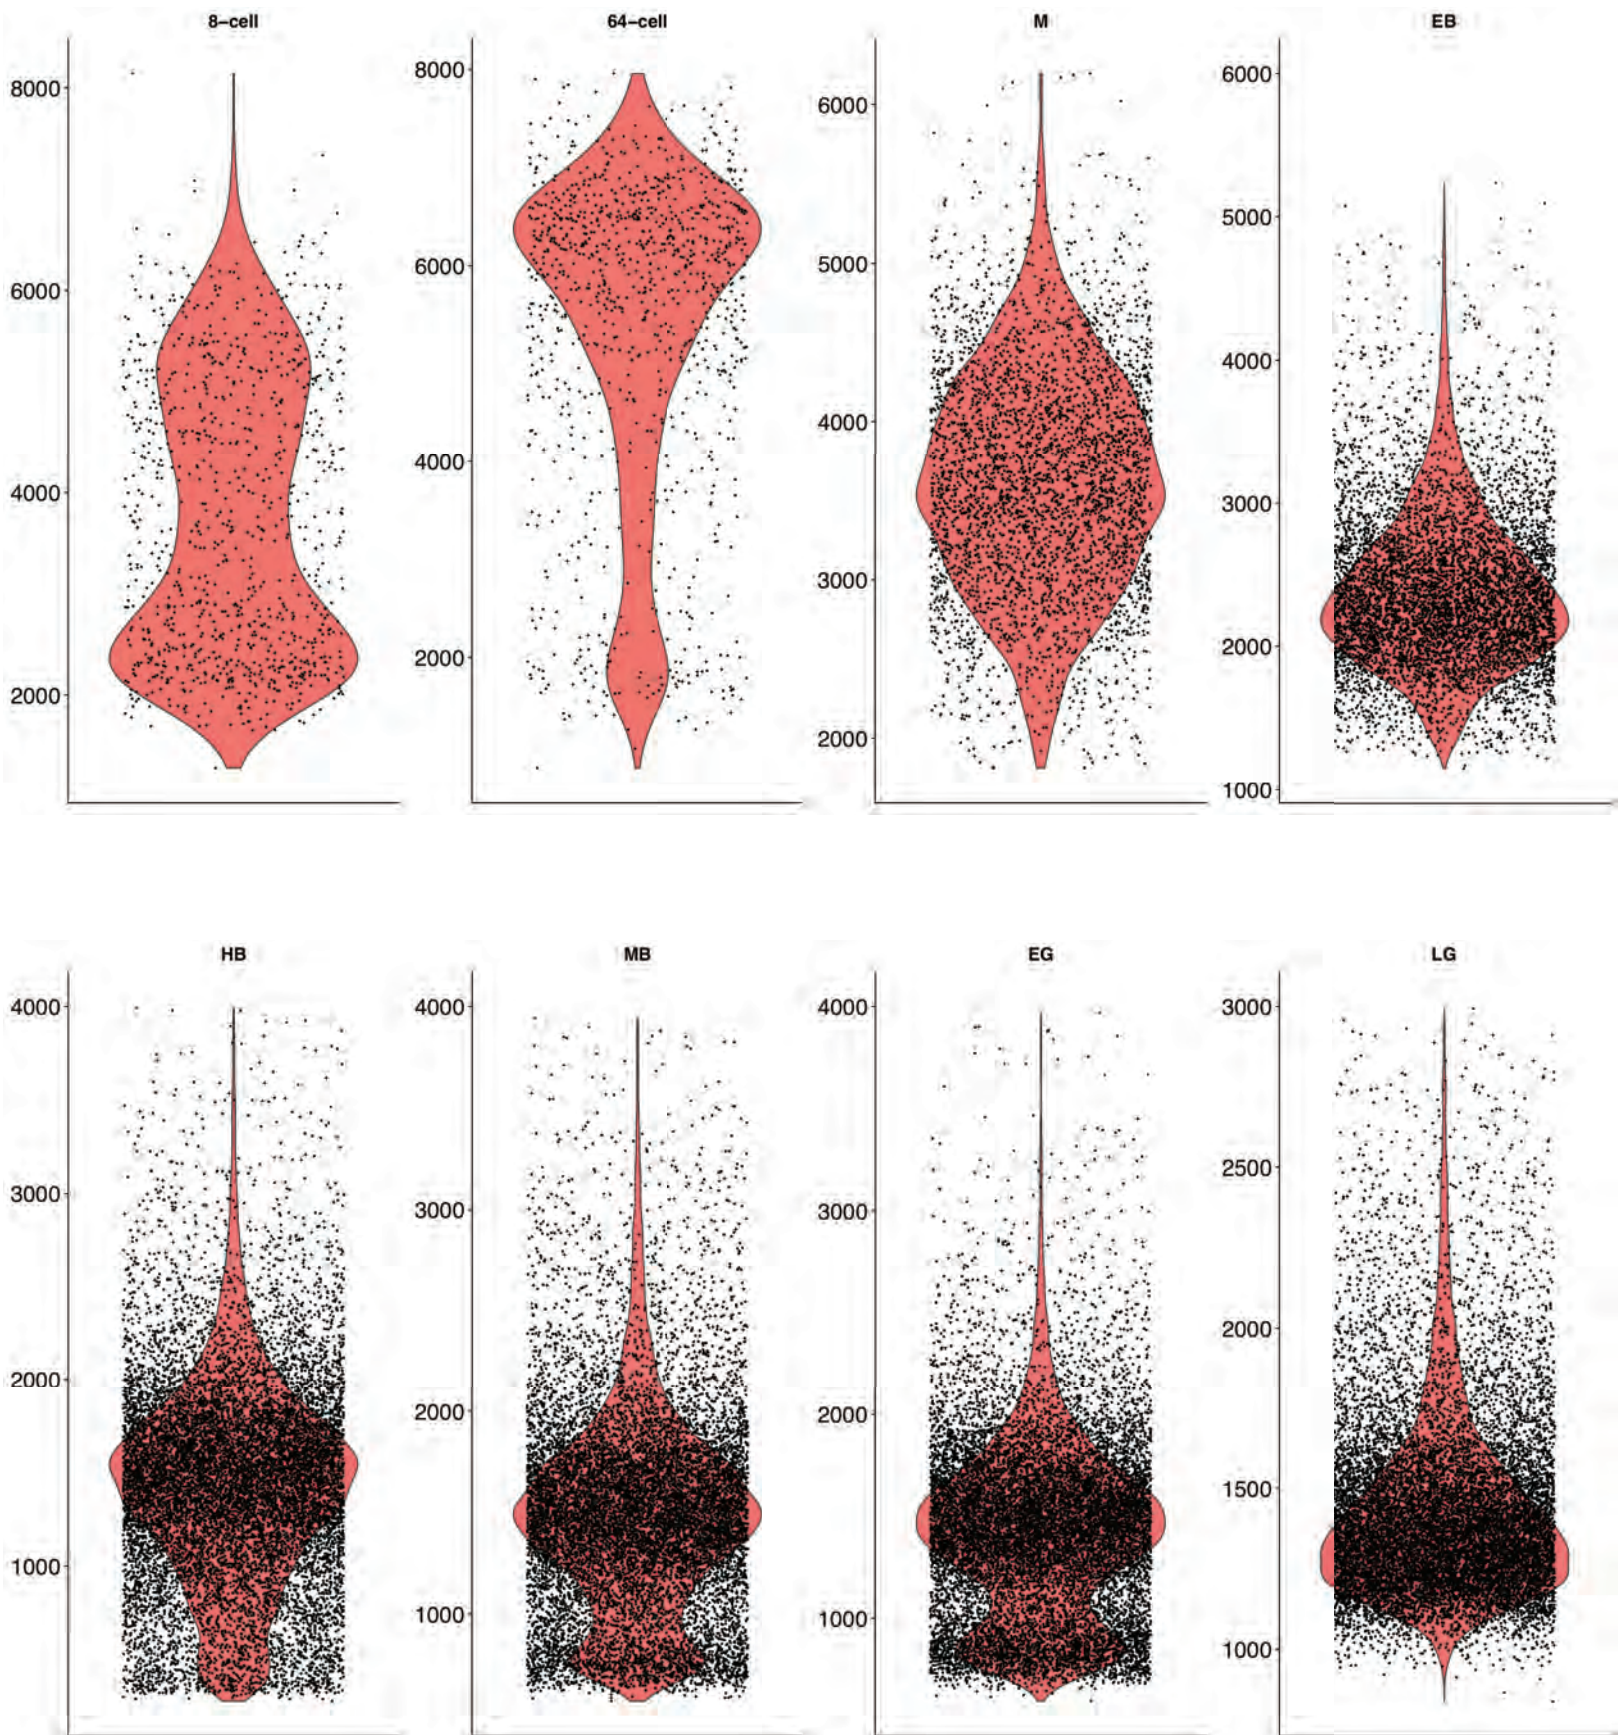

Fig. S2. Total genes detected per cell across developmental time points.



Fig. S3

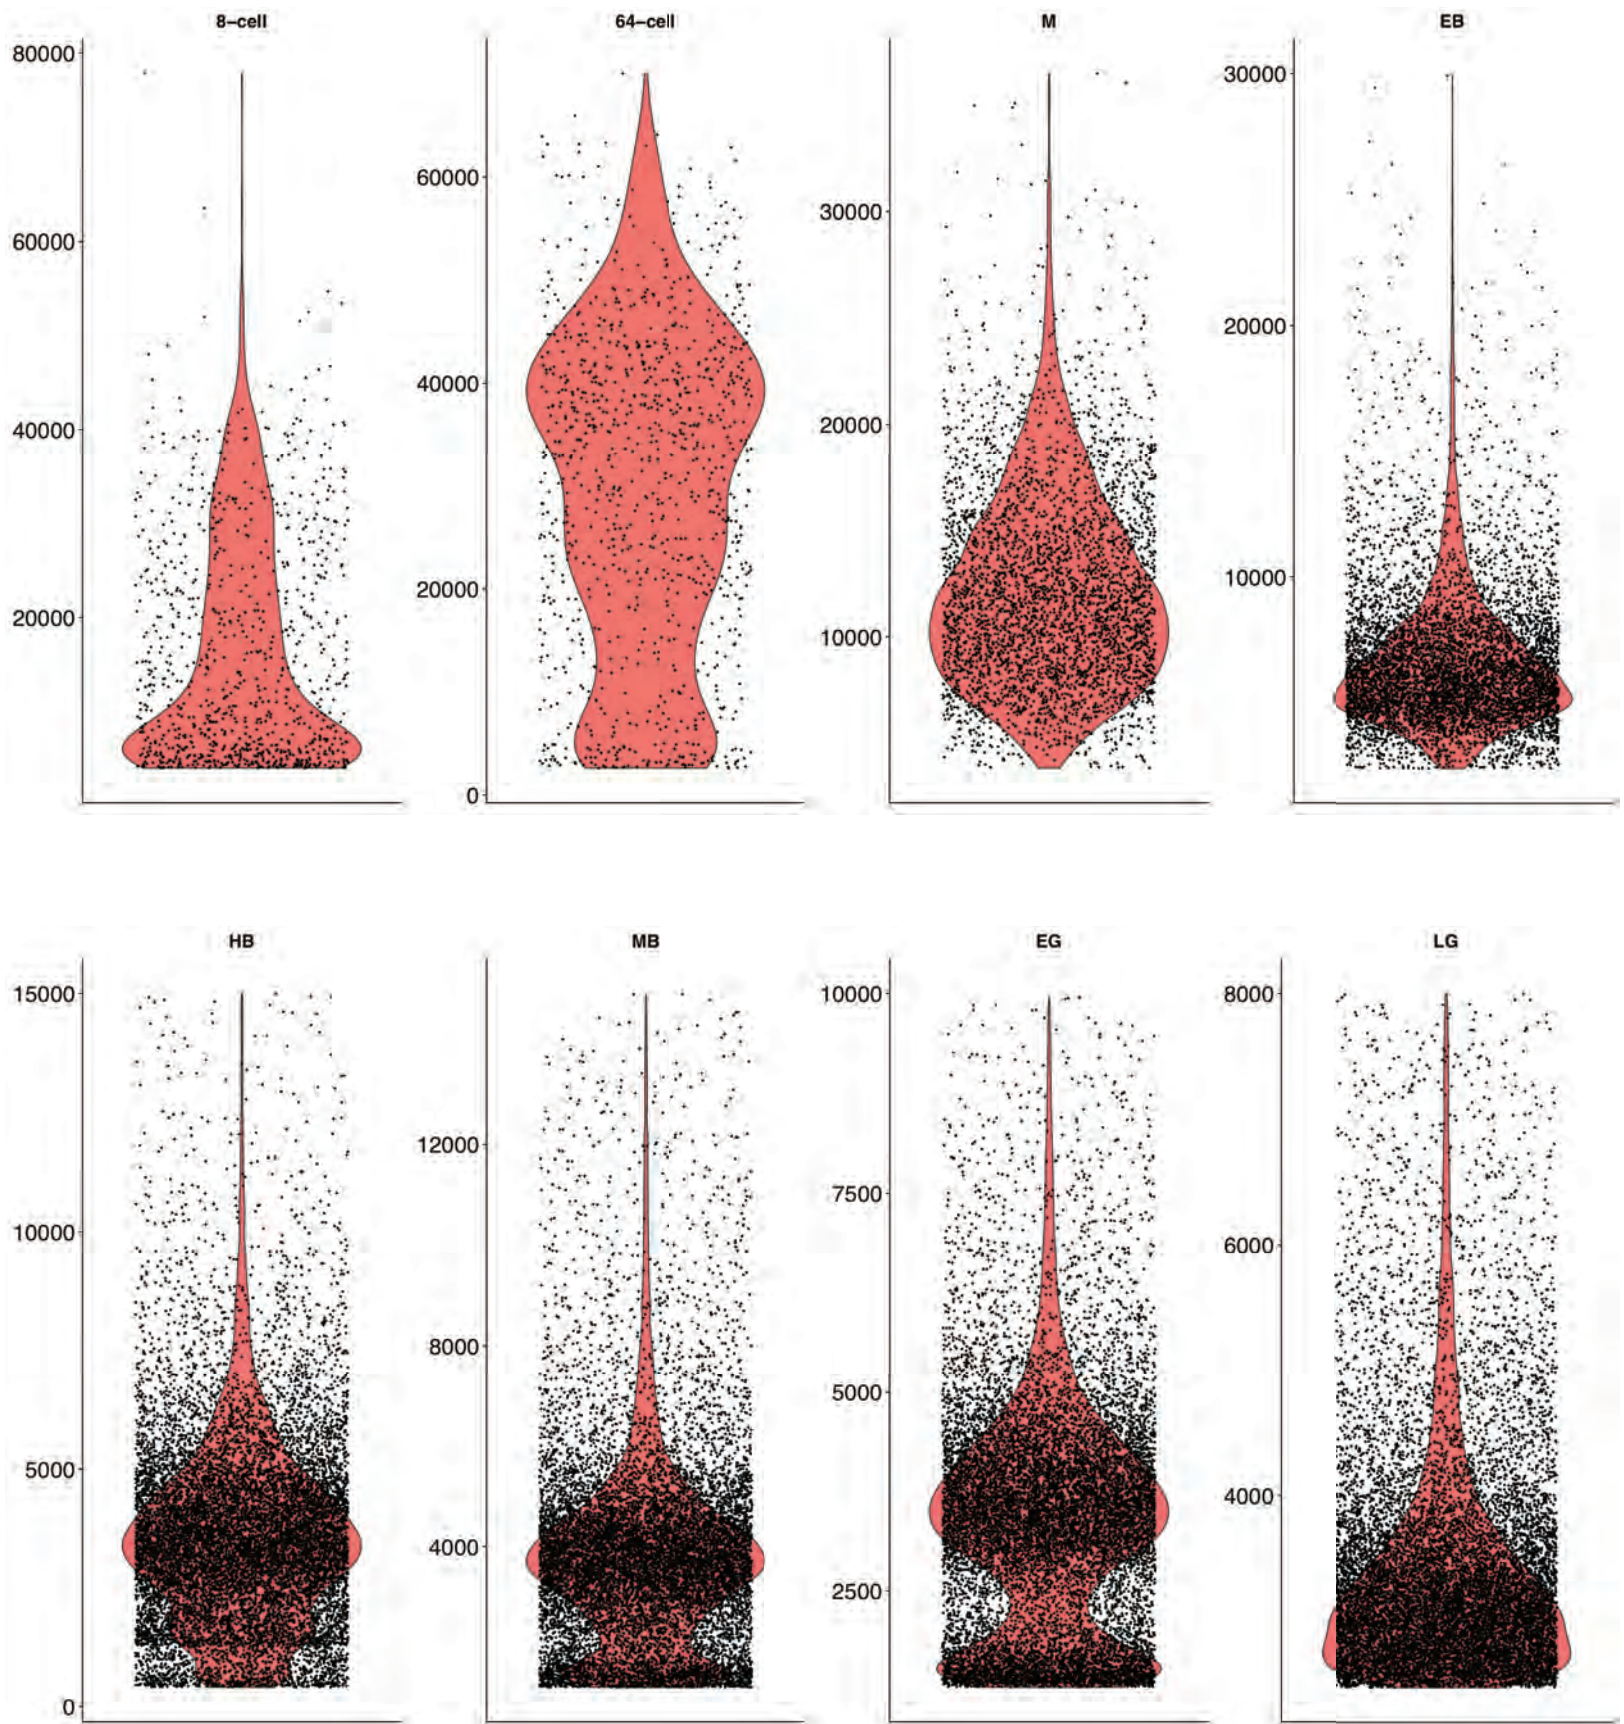

Fig. S3. Total UMIs detected per cell across developmental time points.



Fig. S4: SoxB2

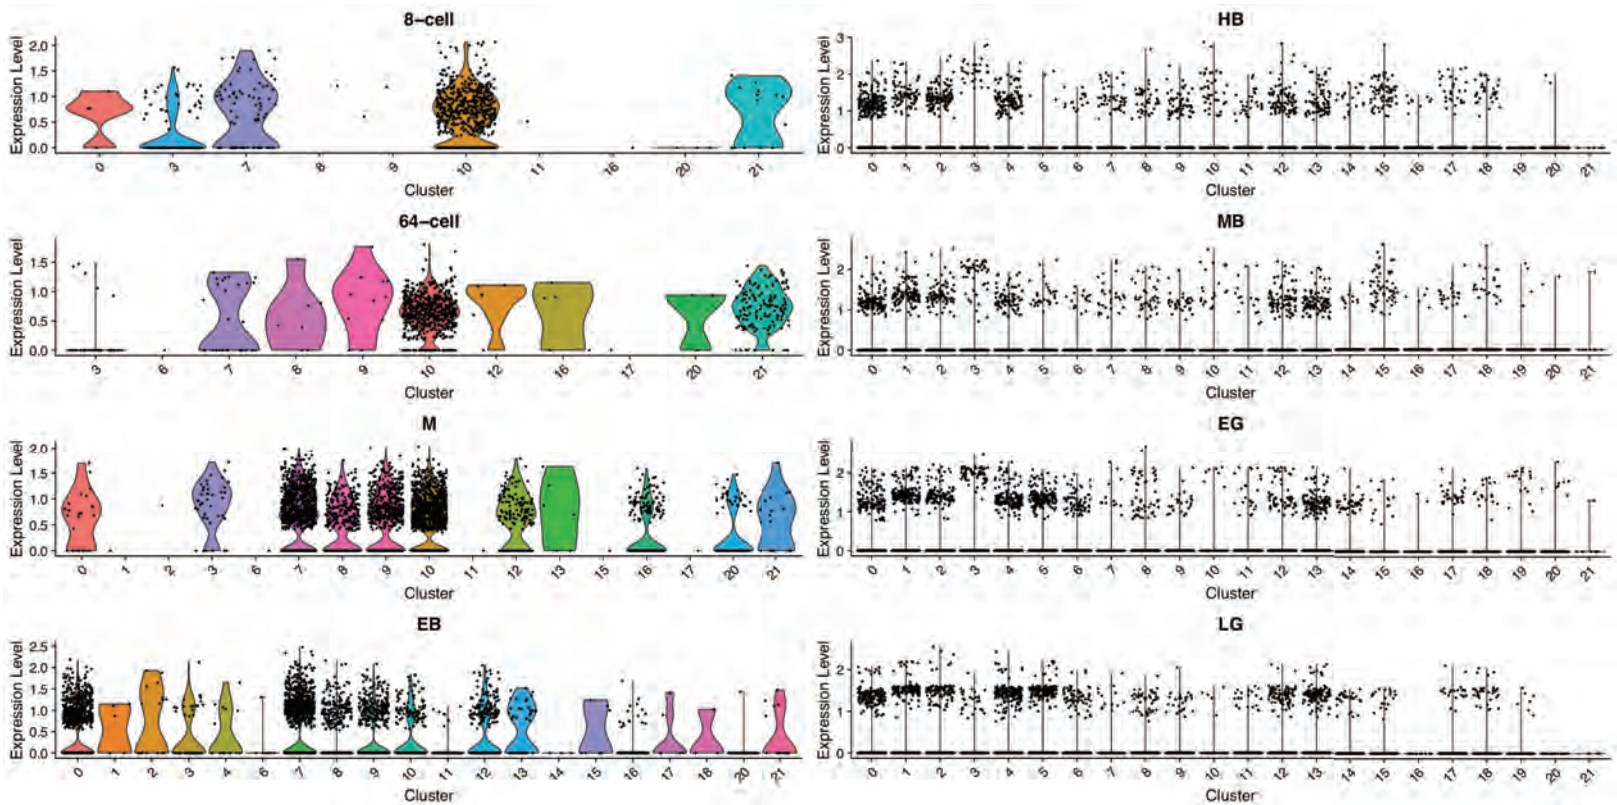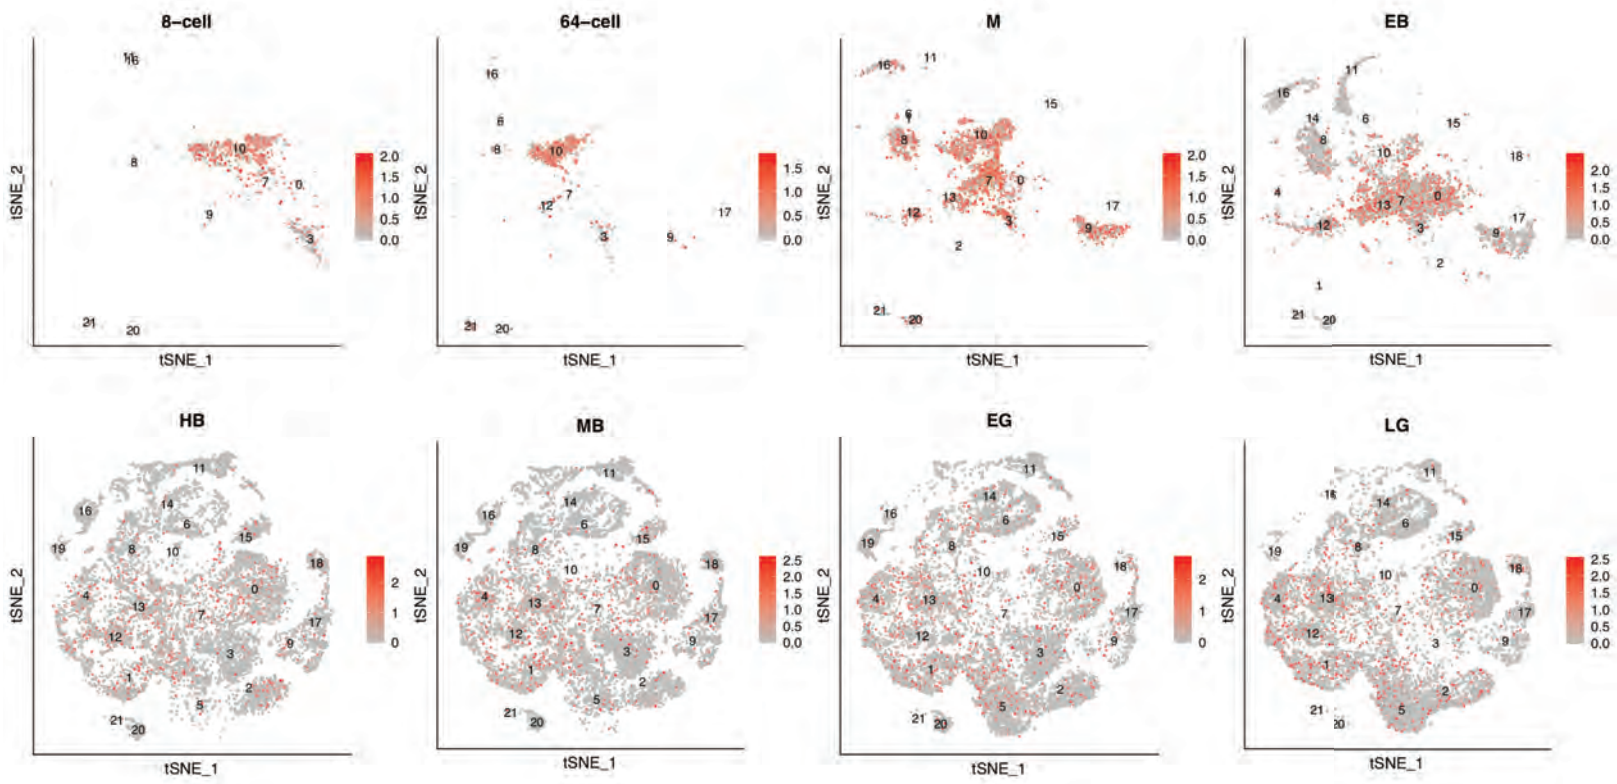

Fig. S4-S7. Violin plots showing expression across different clusters at each developmental stage. Normalized gene expression values at log scale shown per cell cluster identity for each developmental time point. Plots depict probability density at different expression levels. Feature plots showing expression across different clusters at each developmental stage.



Fig. S5: Foxq2

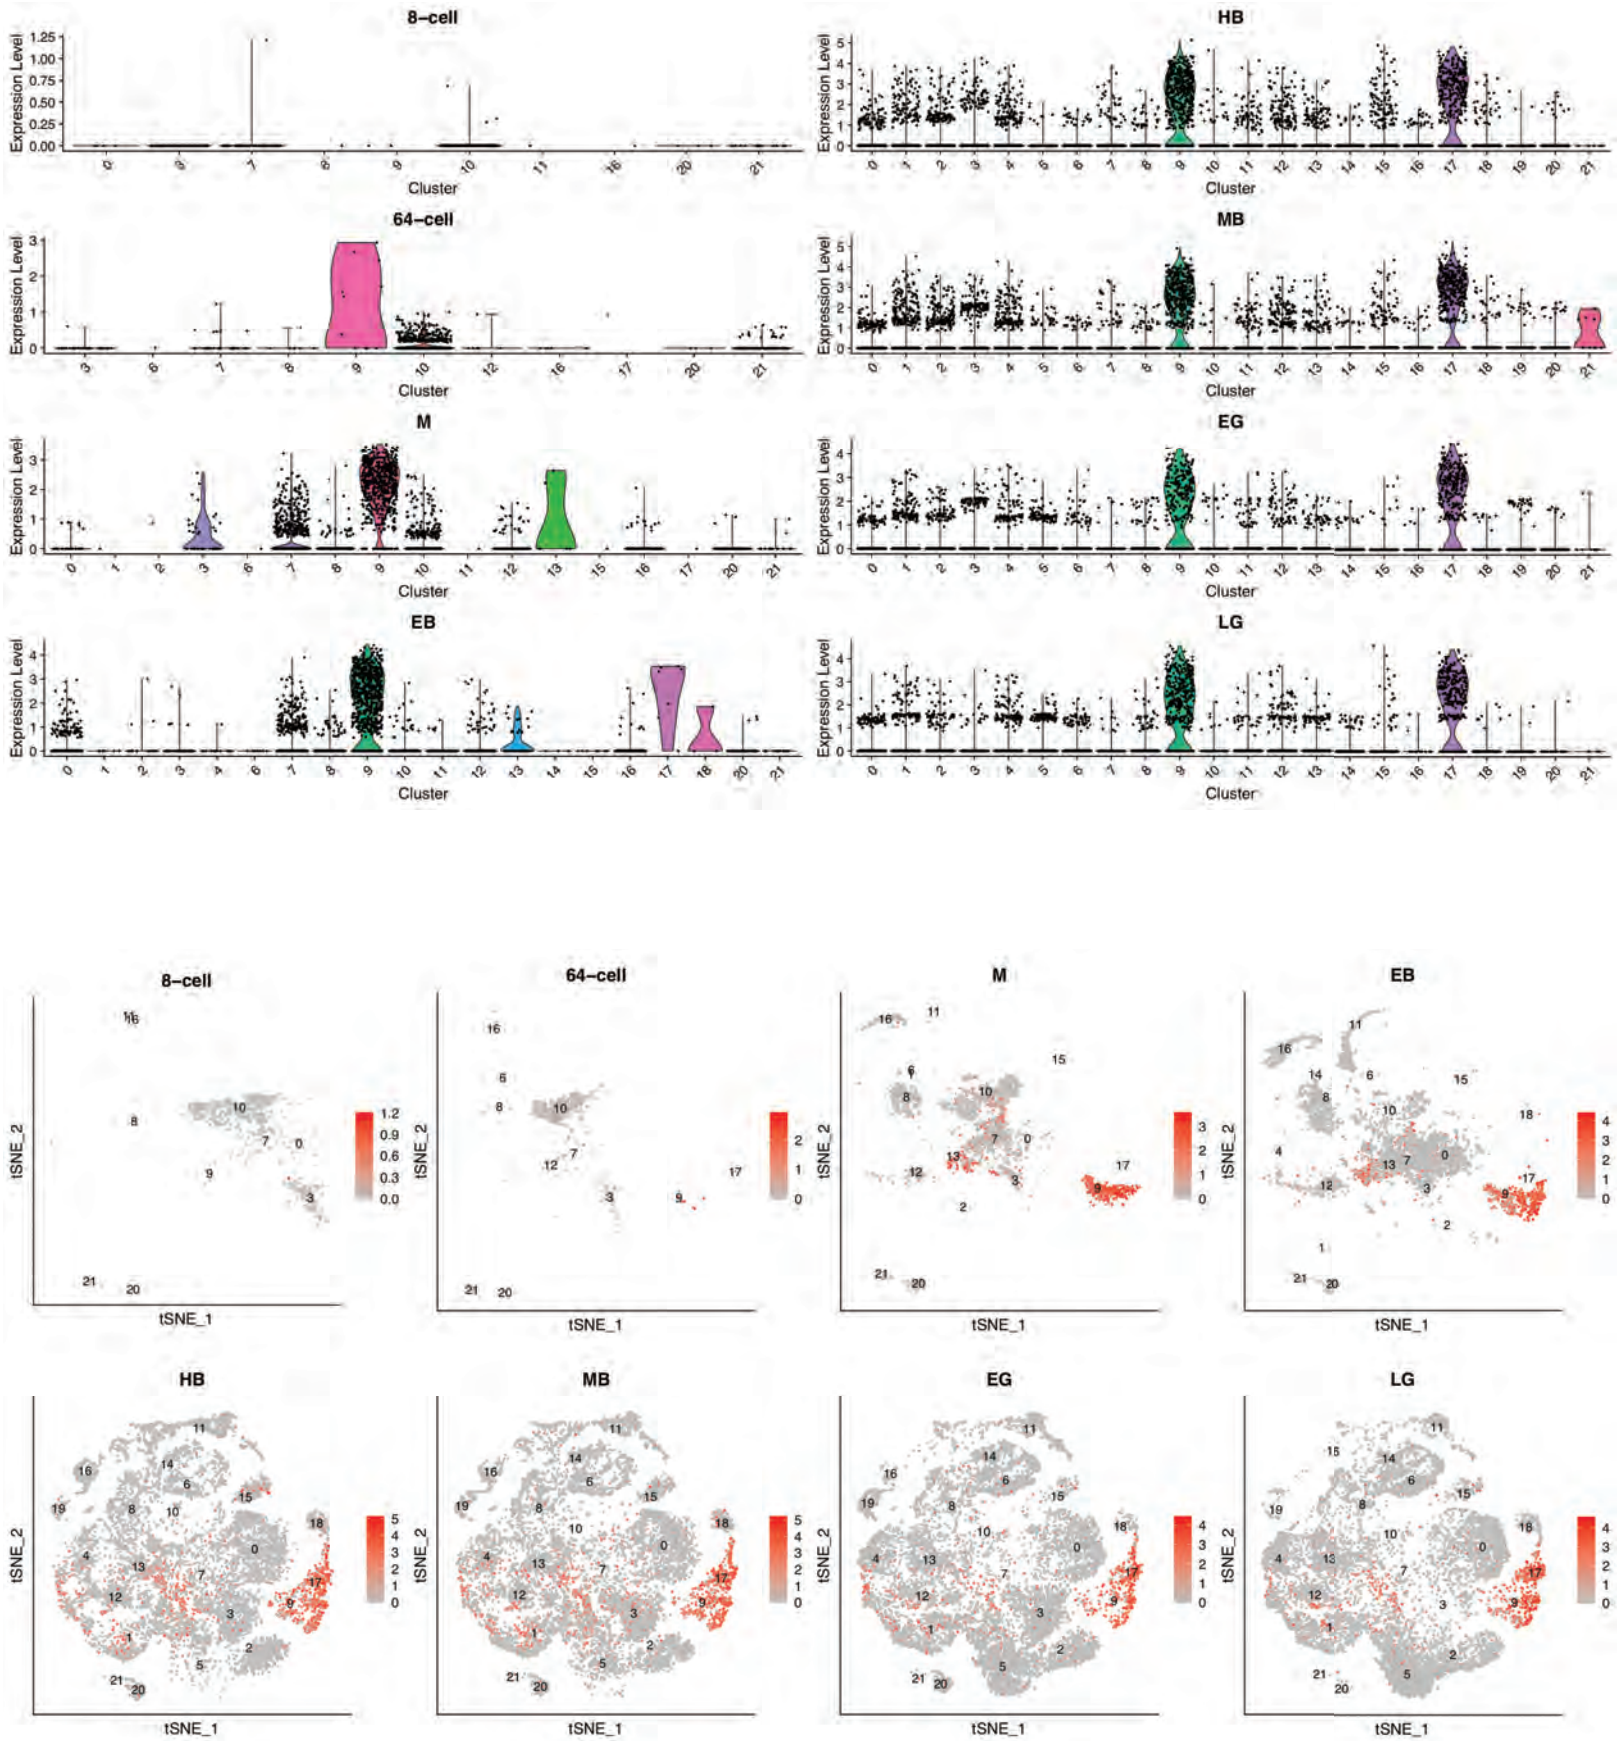



Fig. S6: FoxA

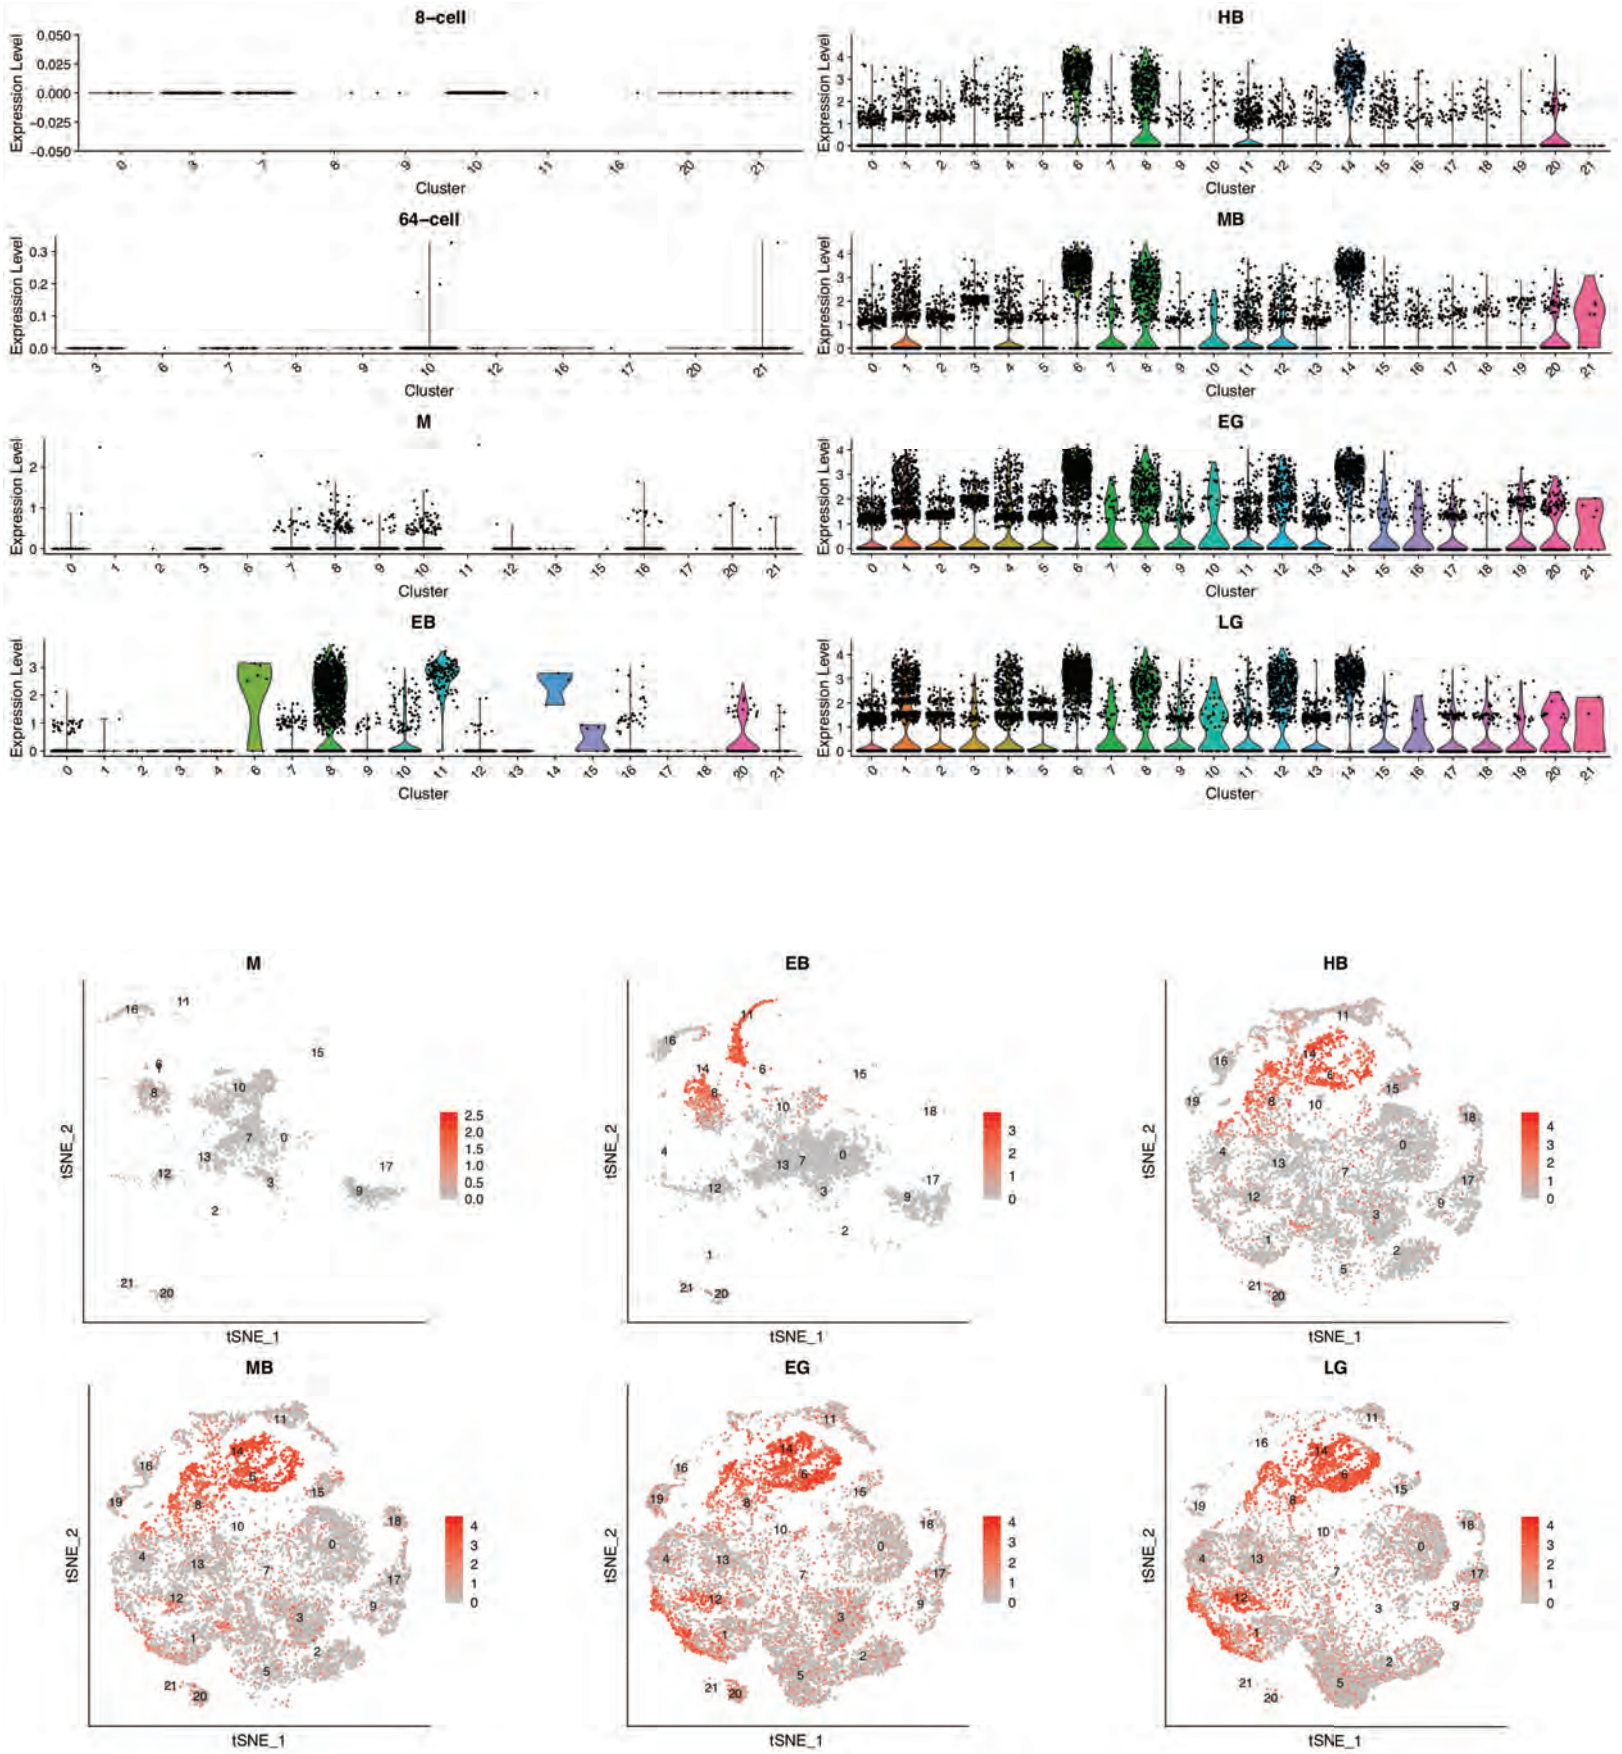



Fig. S7: Endo16

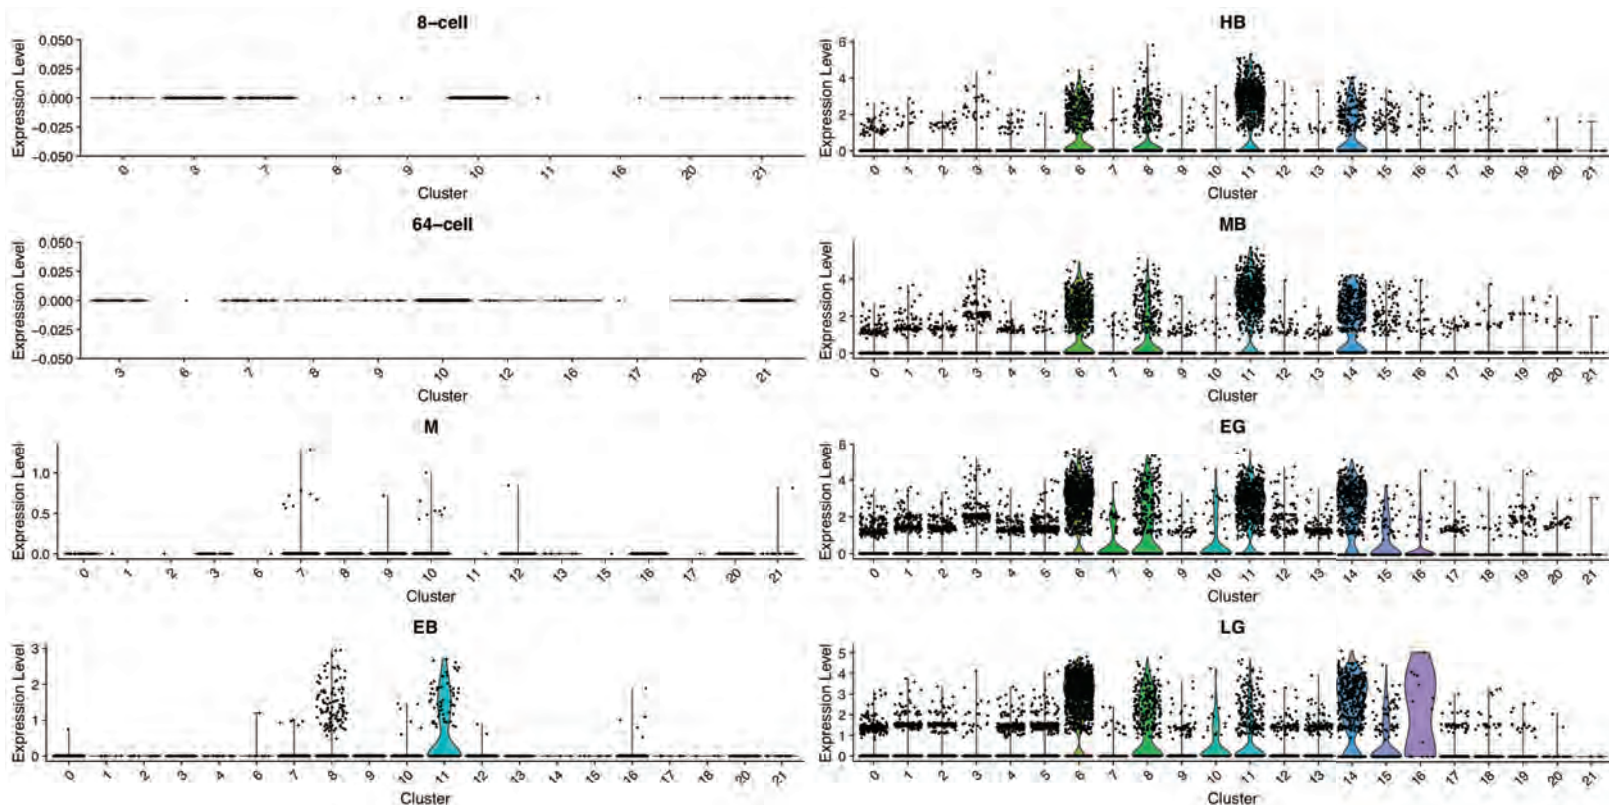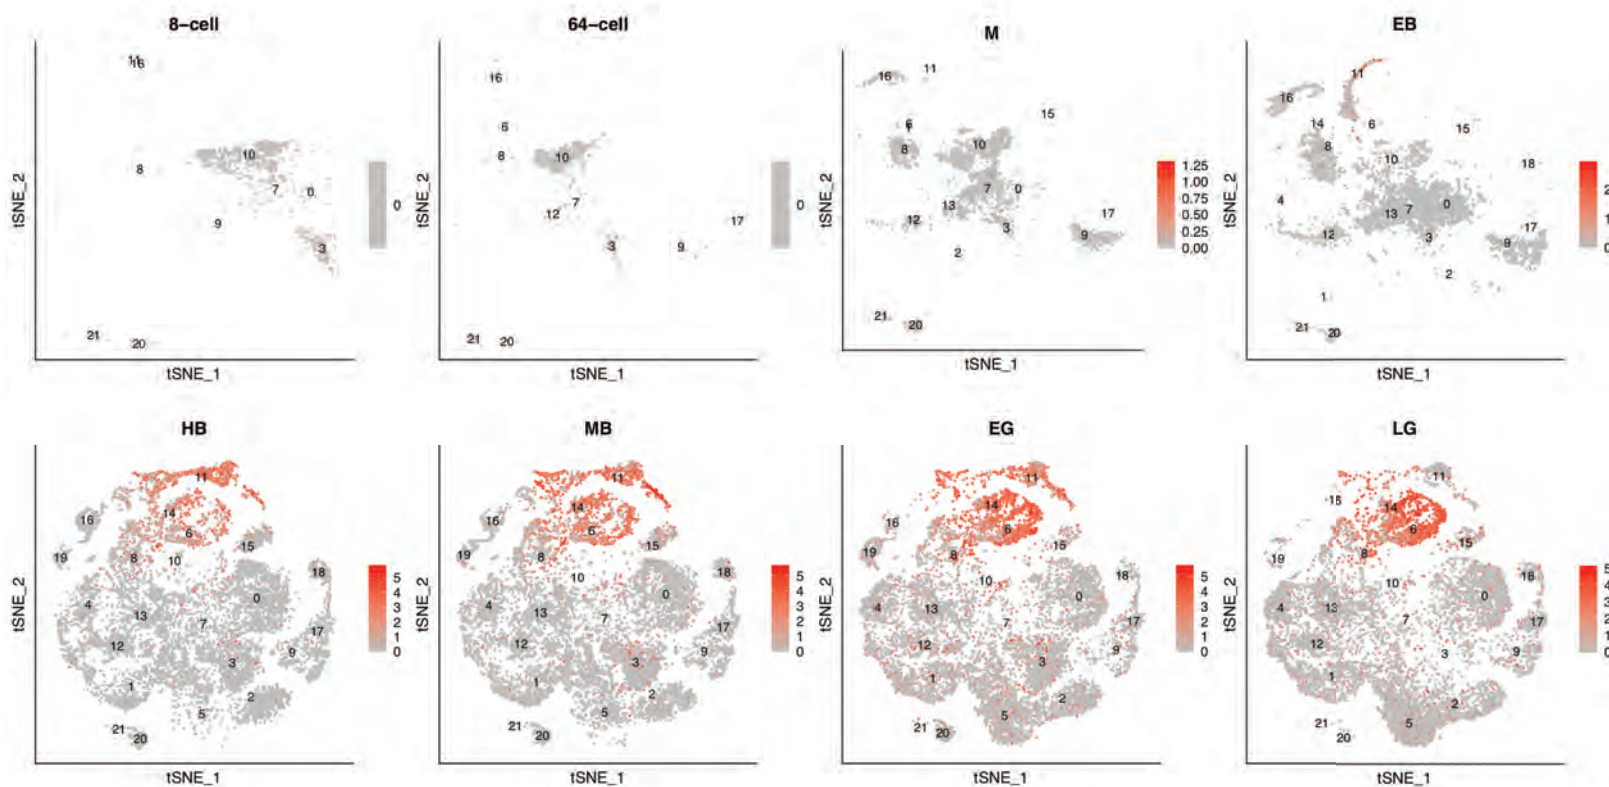

Fig. S8

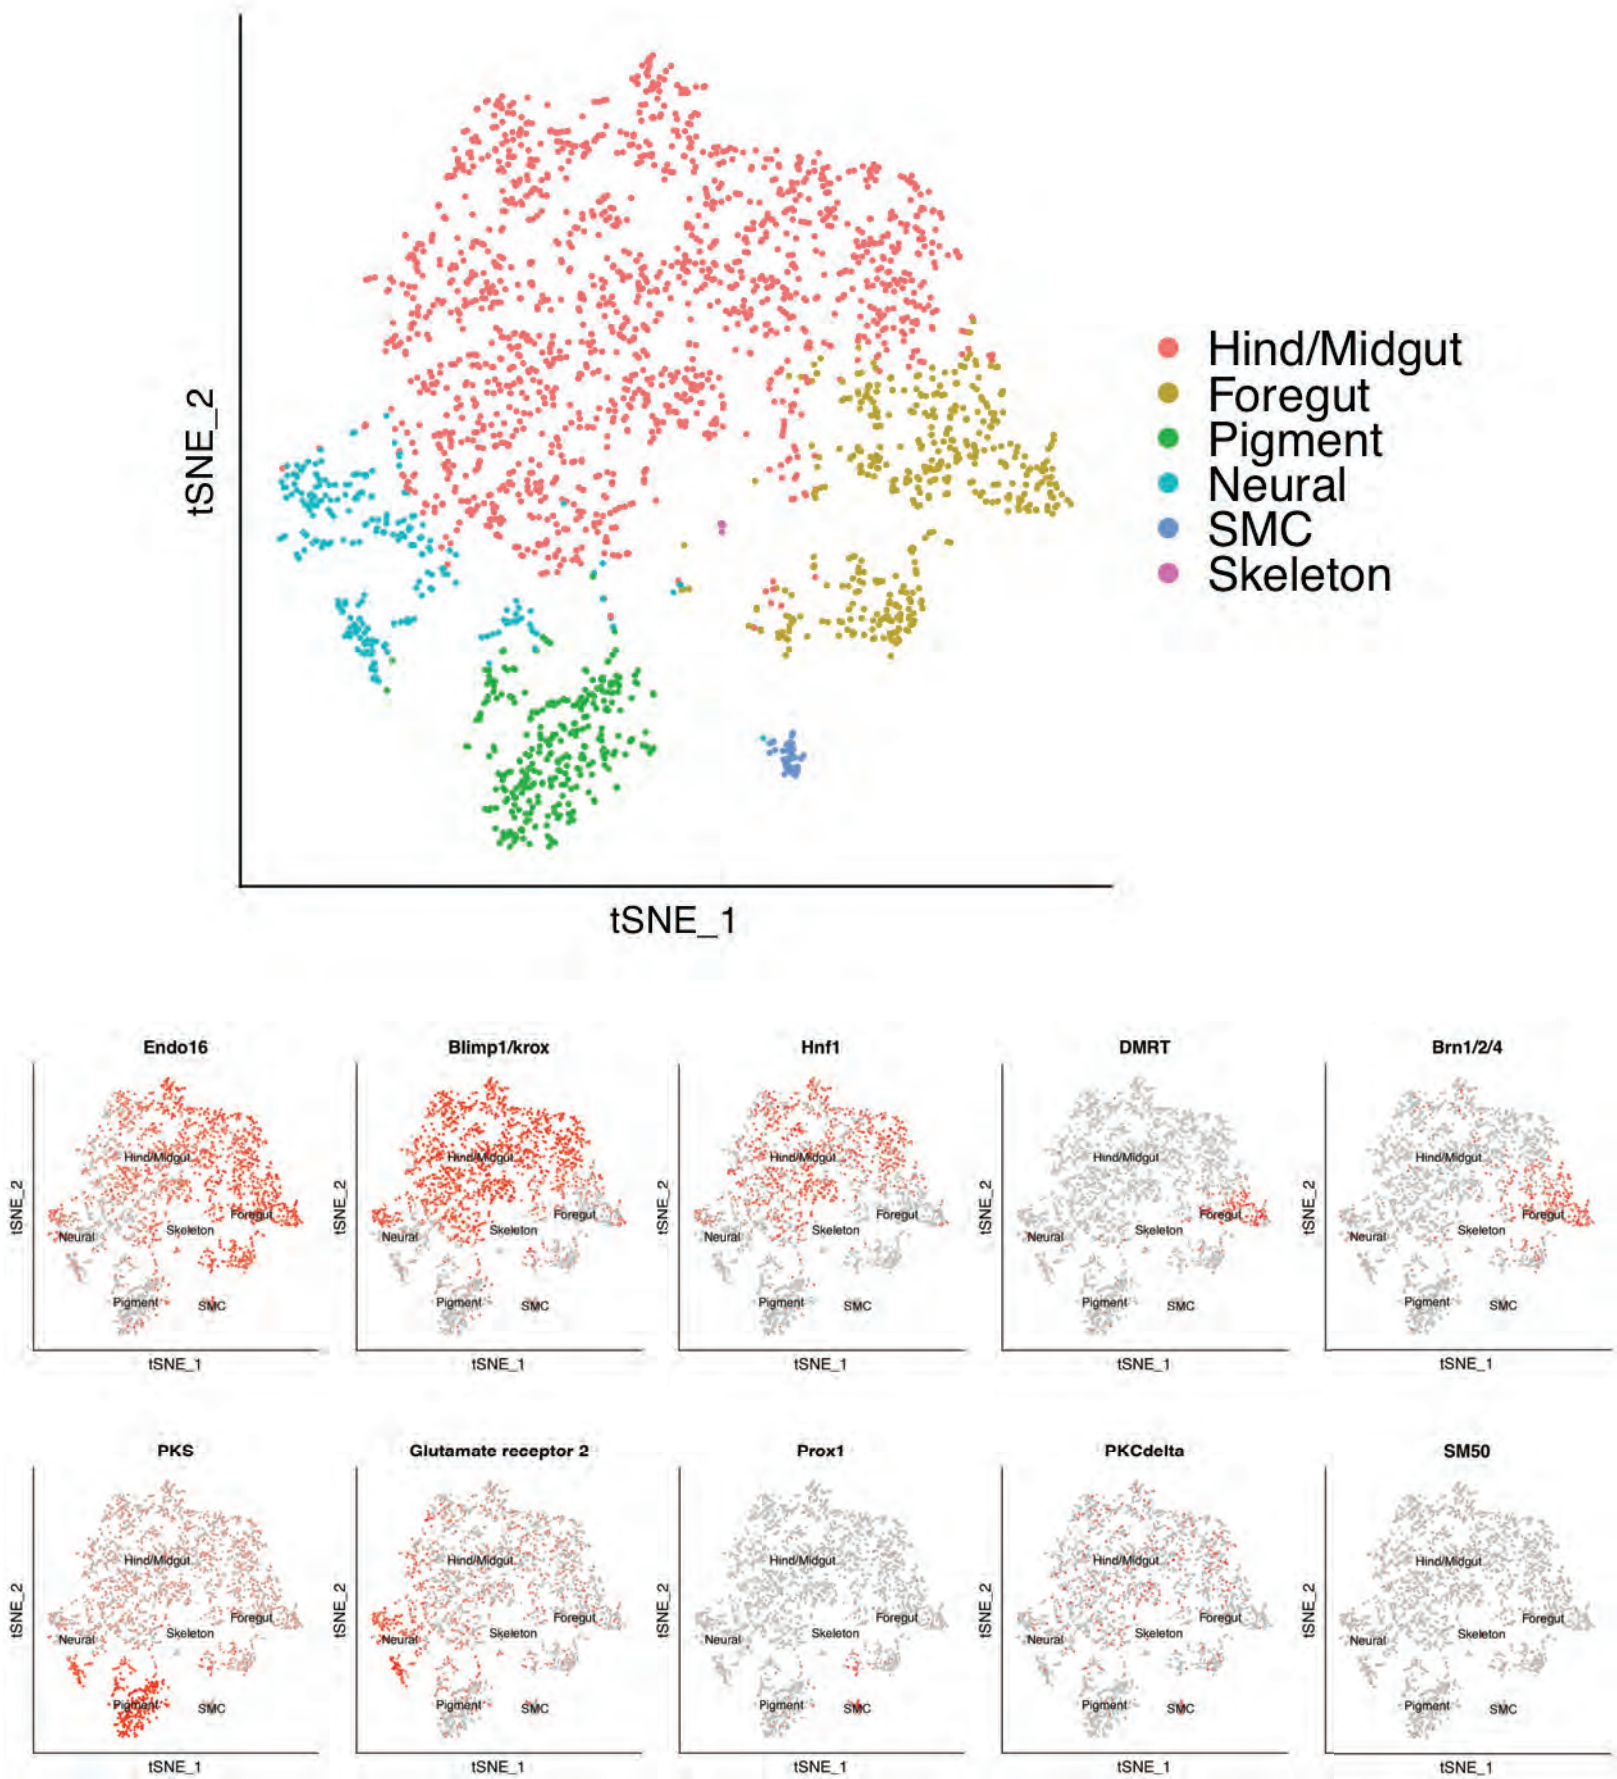

Fig. S8. Subclustering of gut clusters at late gastrula. Endo16-positive clusters 6, 8, 11, and 14 subcluster into seven cell types. Feature plots highlighting subcluster marker genes.



Fig. S9: Alx1

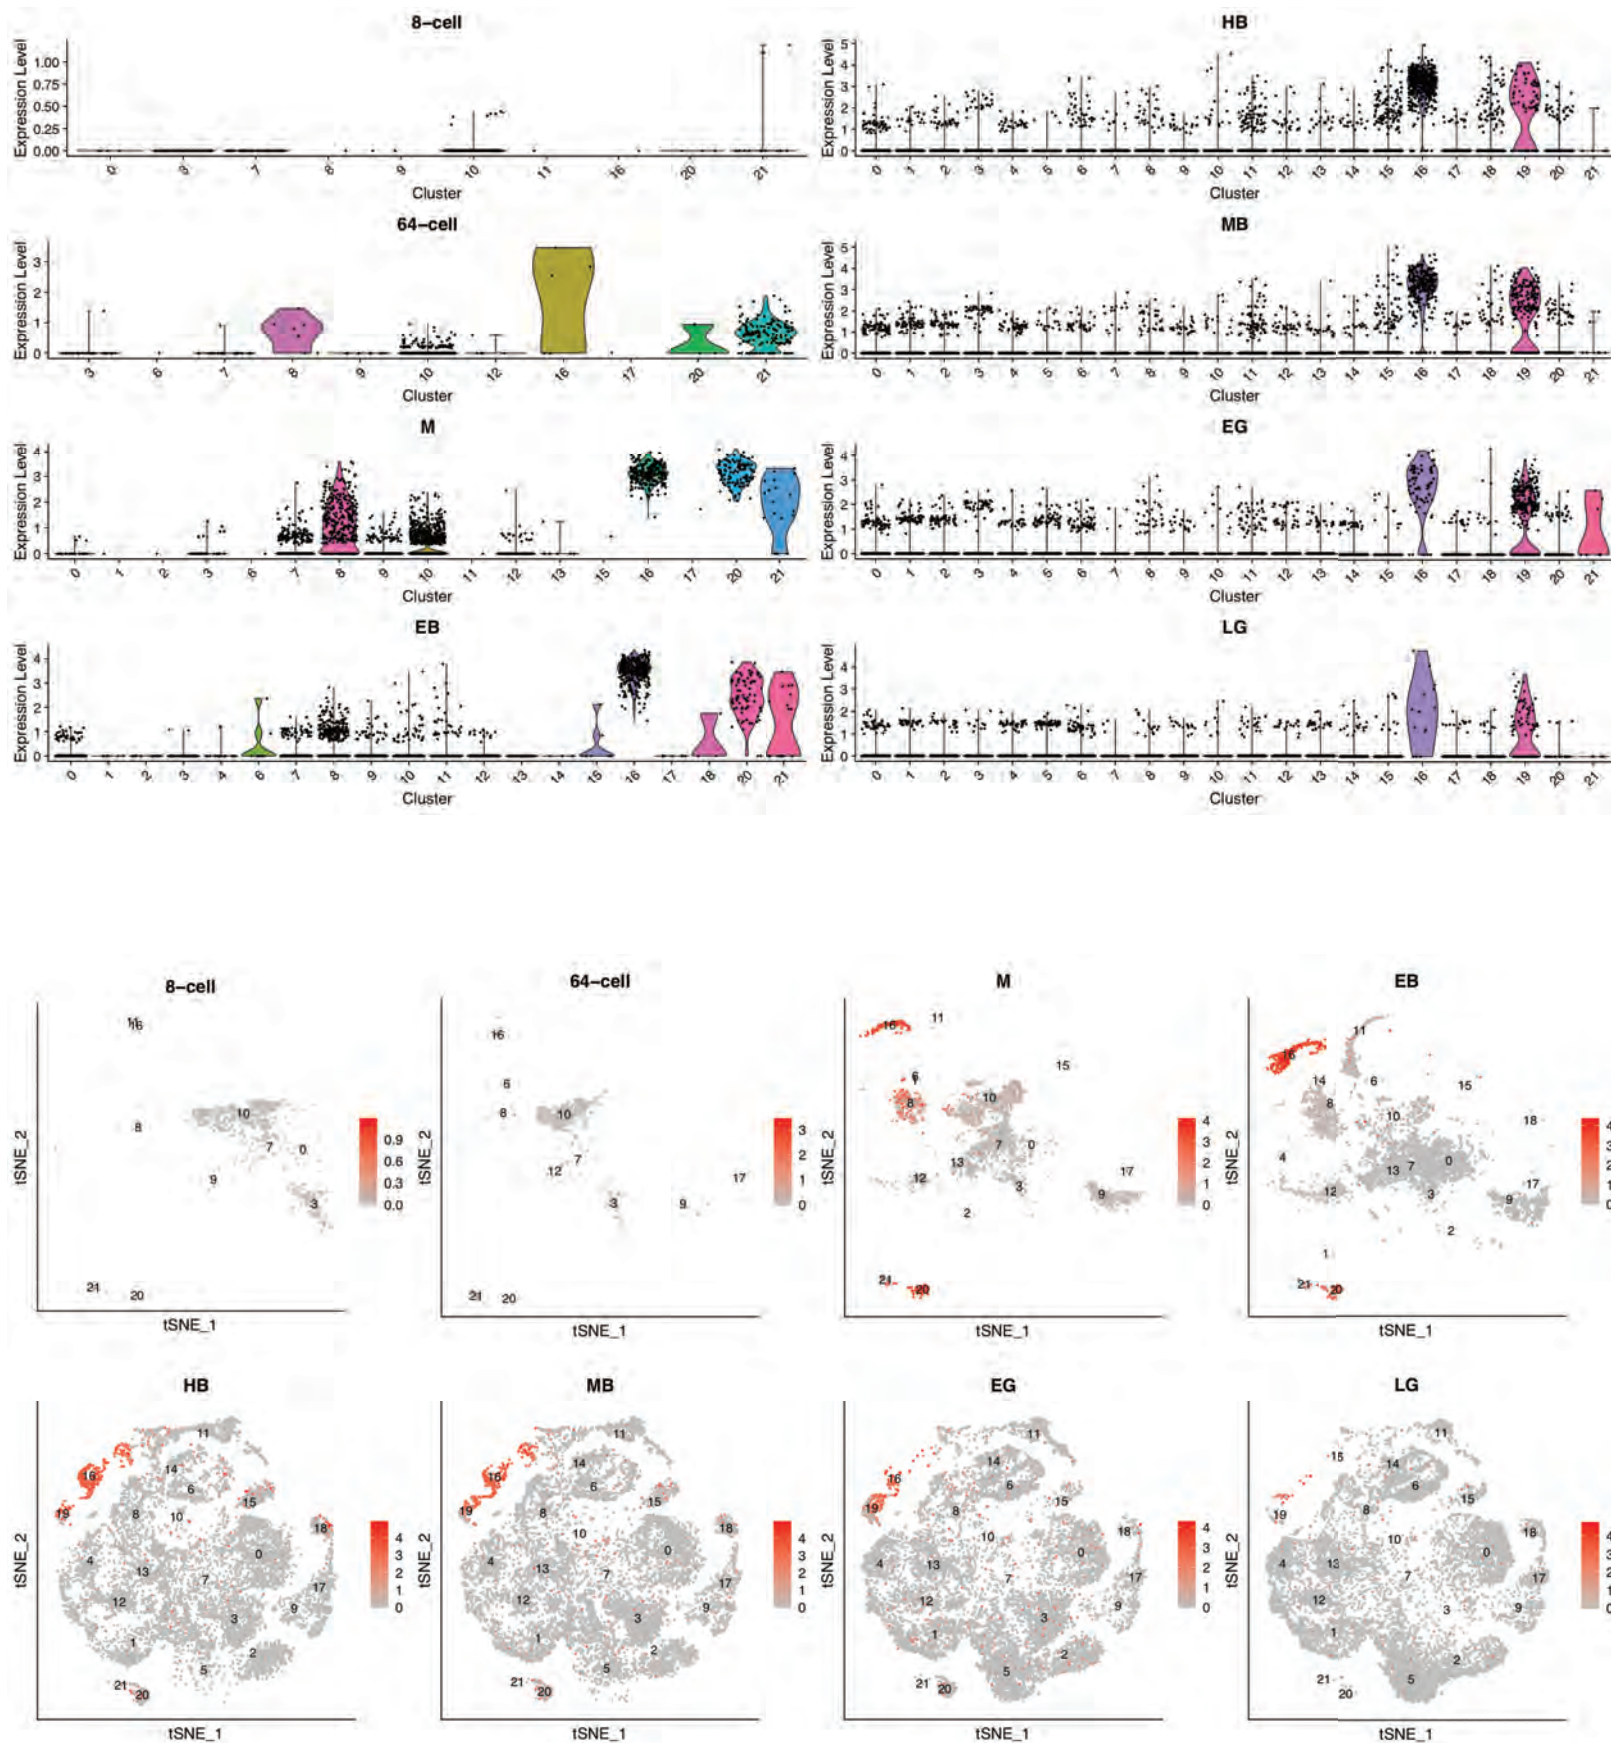

Fig. S9-S15, S17-24. Violin plots showing expression across different clusters at each developmental stage. Normalized gene expression values at log scale shown per cell cluster identity for each developmental time point. Plots depict probability density at different expression levels. Feature plots showing expression across different clusters at each developmental stage.



Fig. S10: SM50

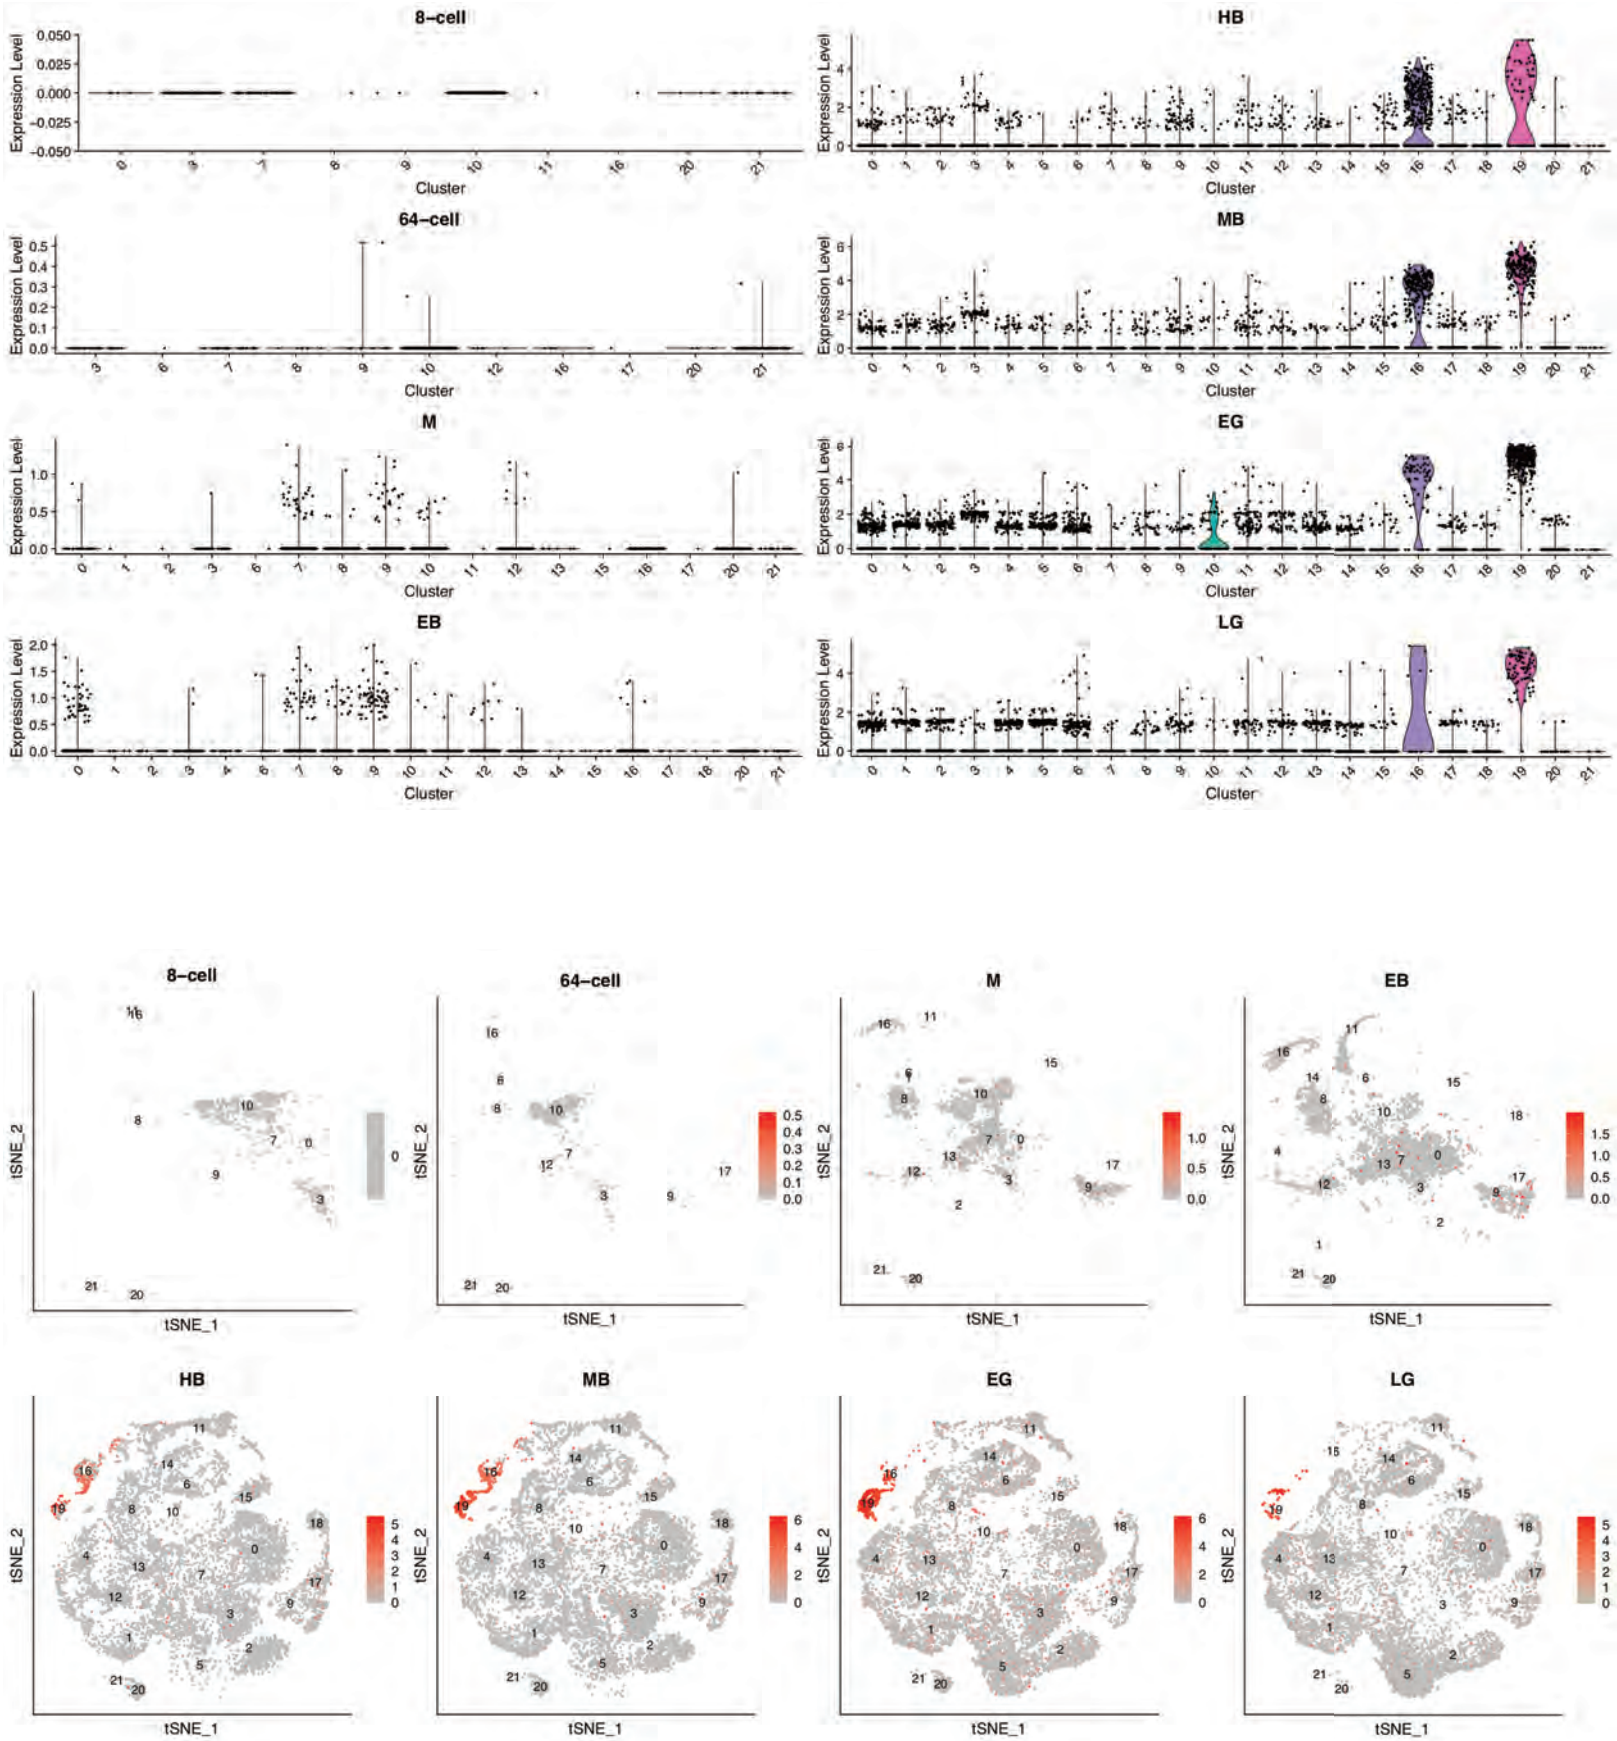



Fig. S11: SM37

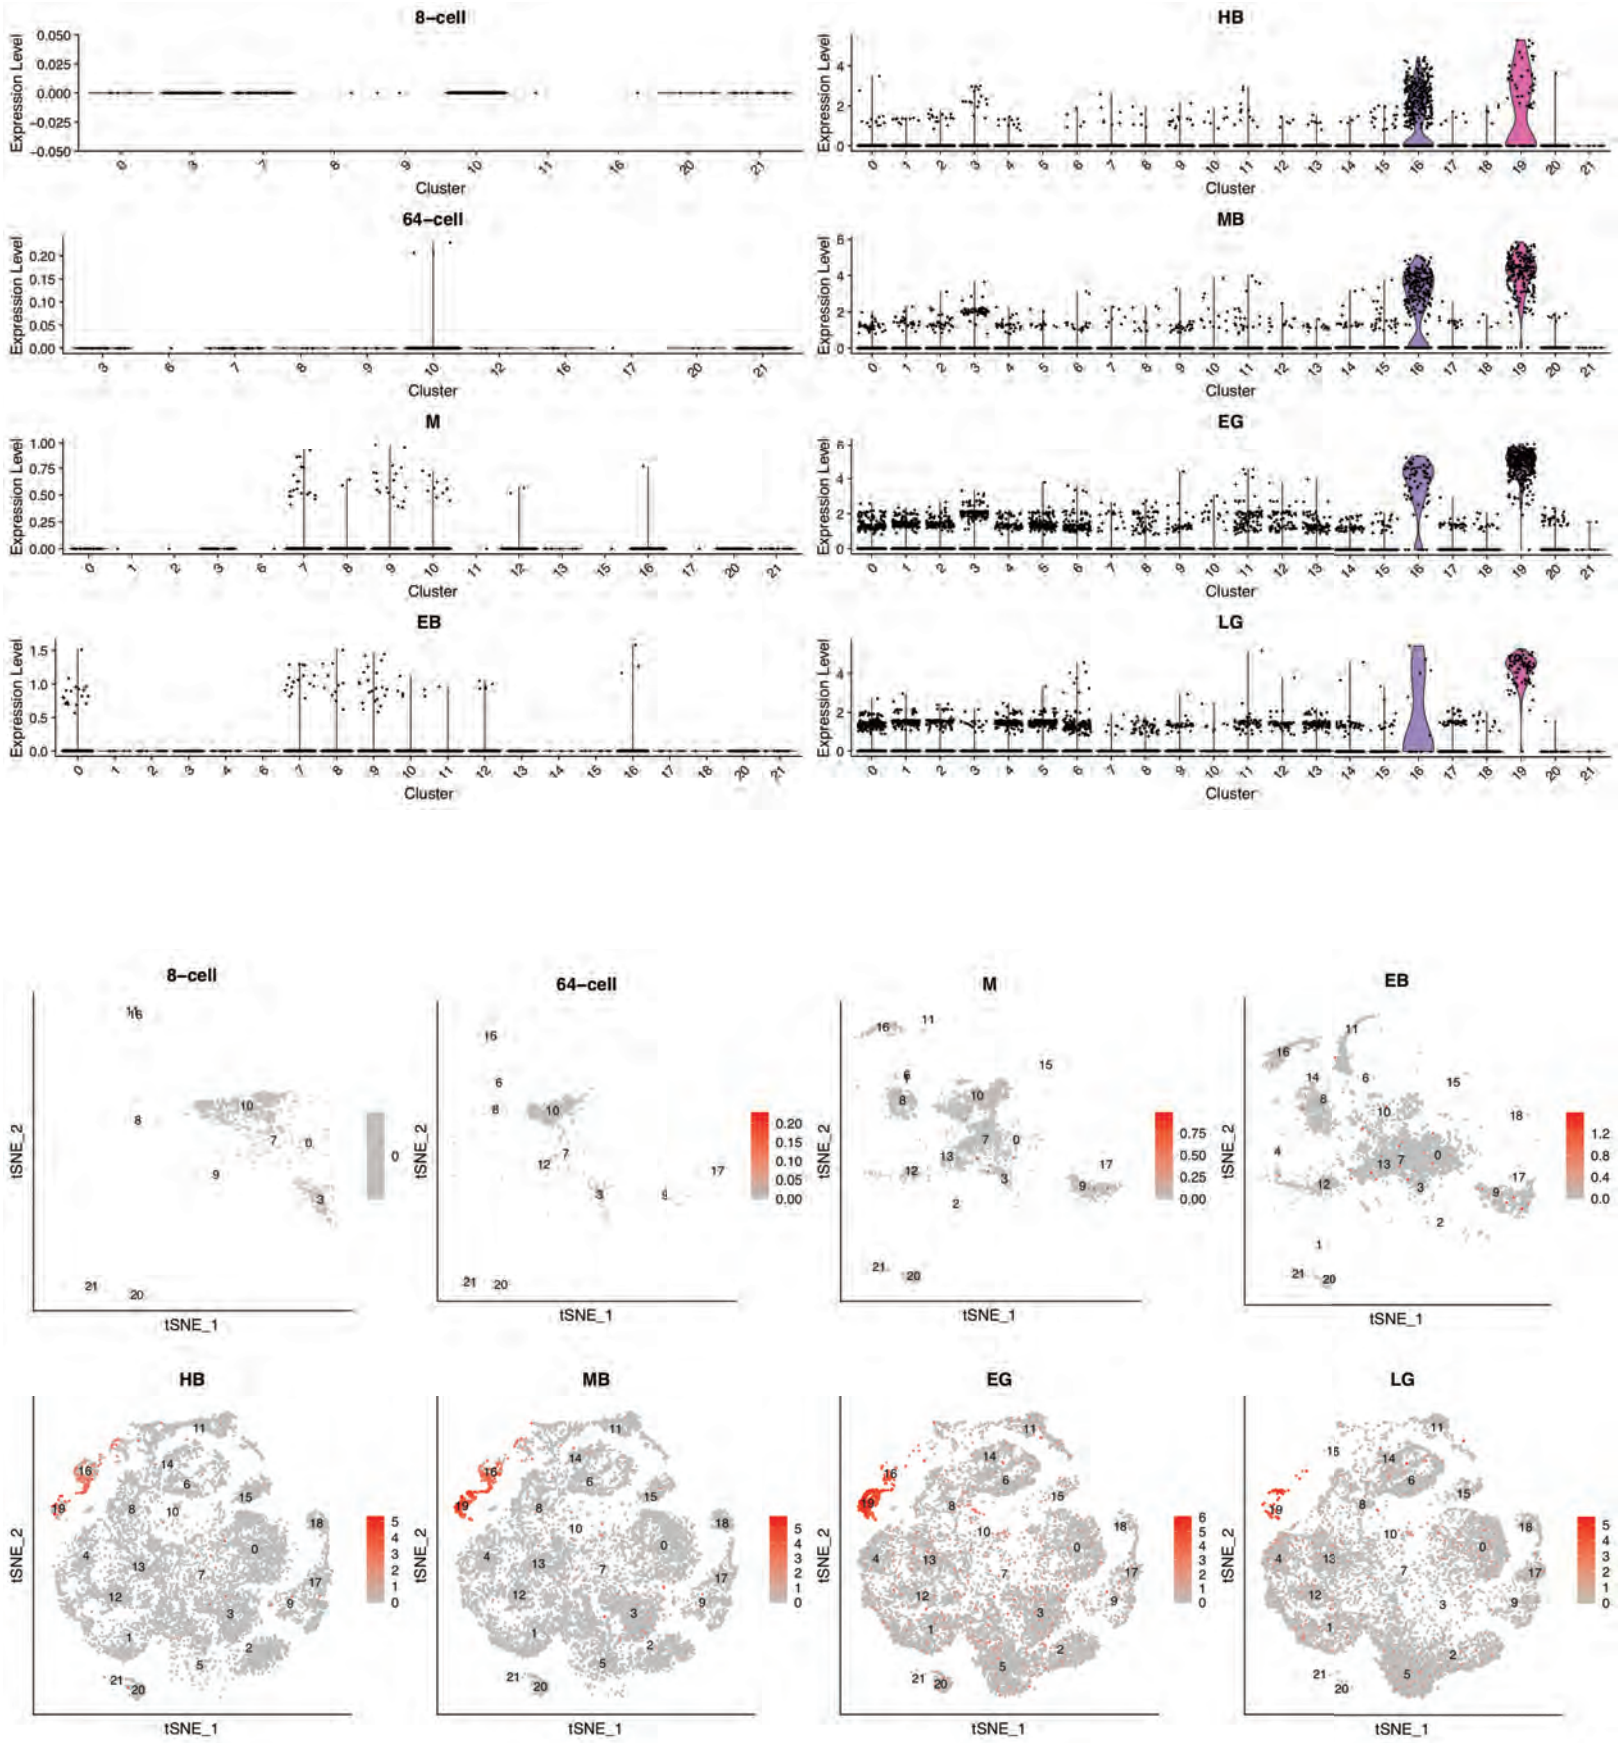



Fig. S12

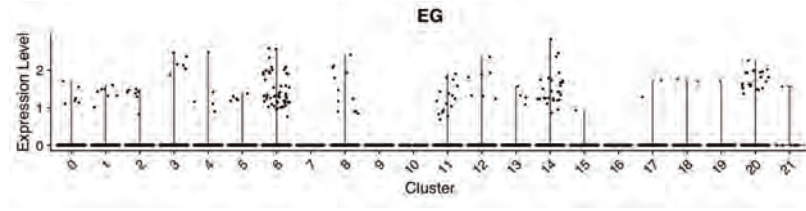

Fig. S12. Violin plot showing enriched expression of FoxY at early gastrula stage in clusters 6, 14, and 20.



Fig. S13: H2A.2.1

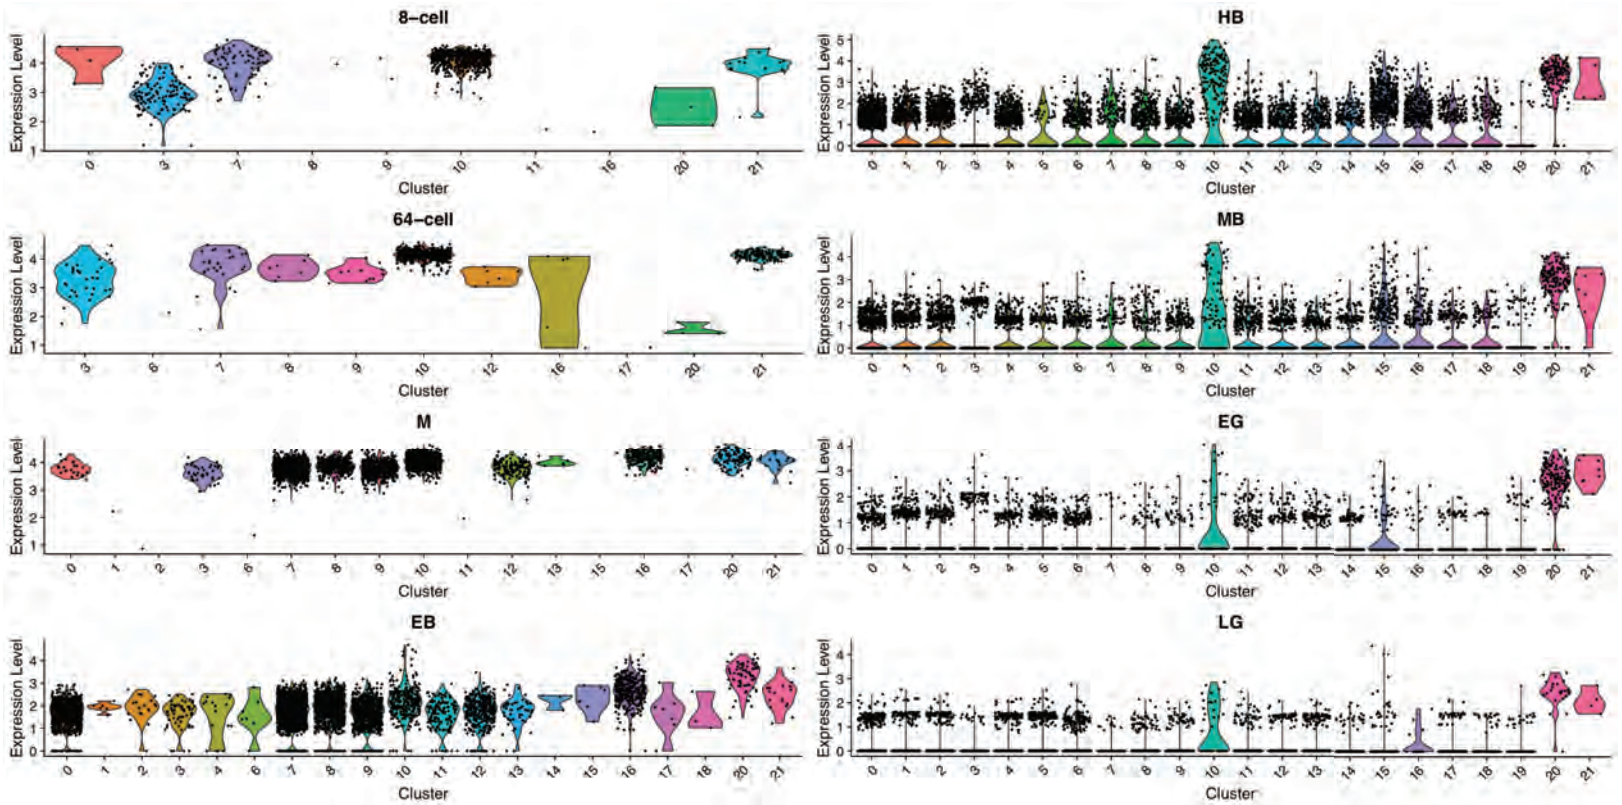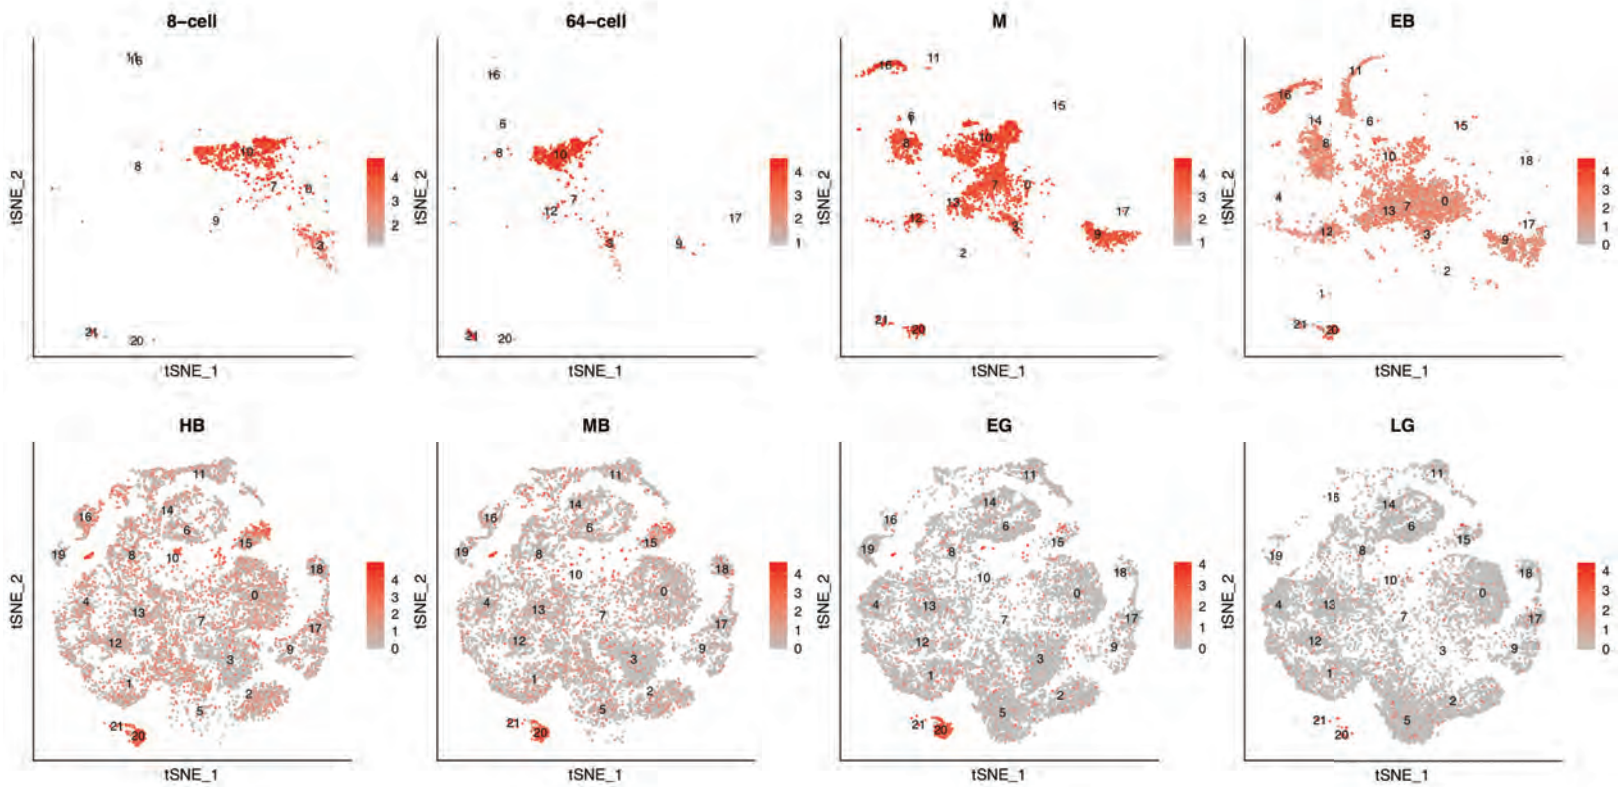



Fig. S14: Vasa

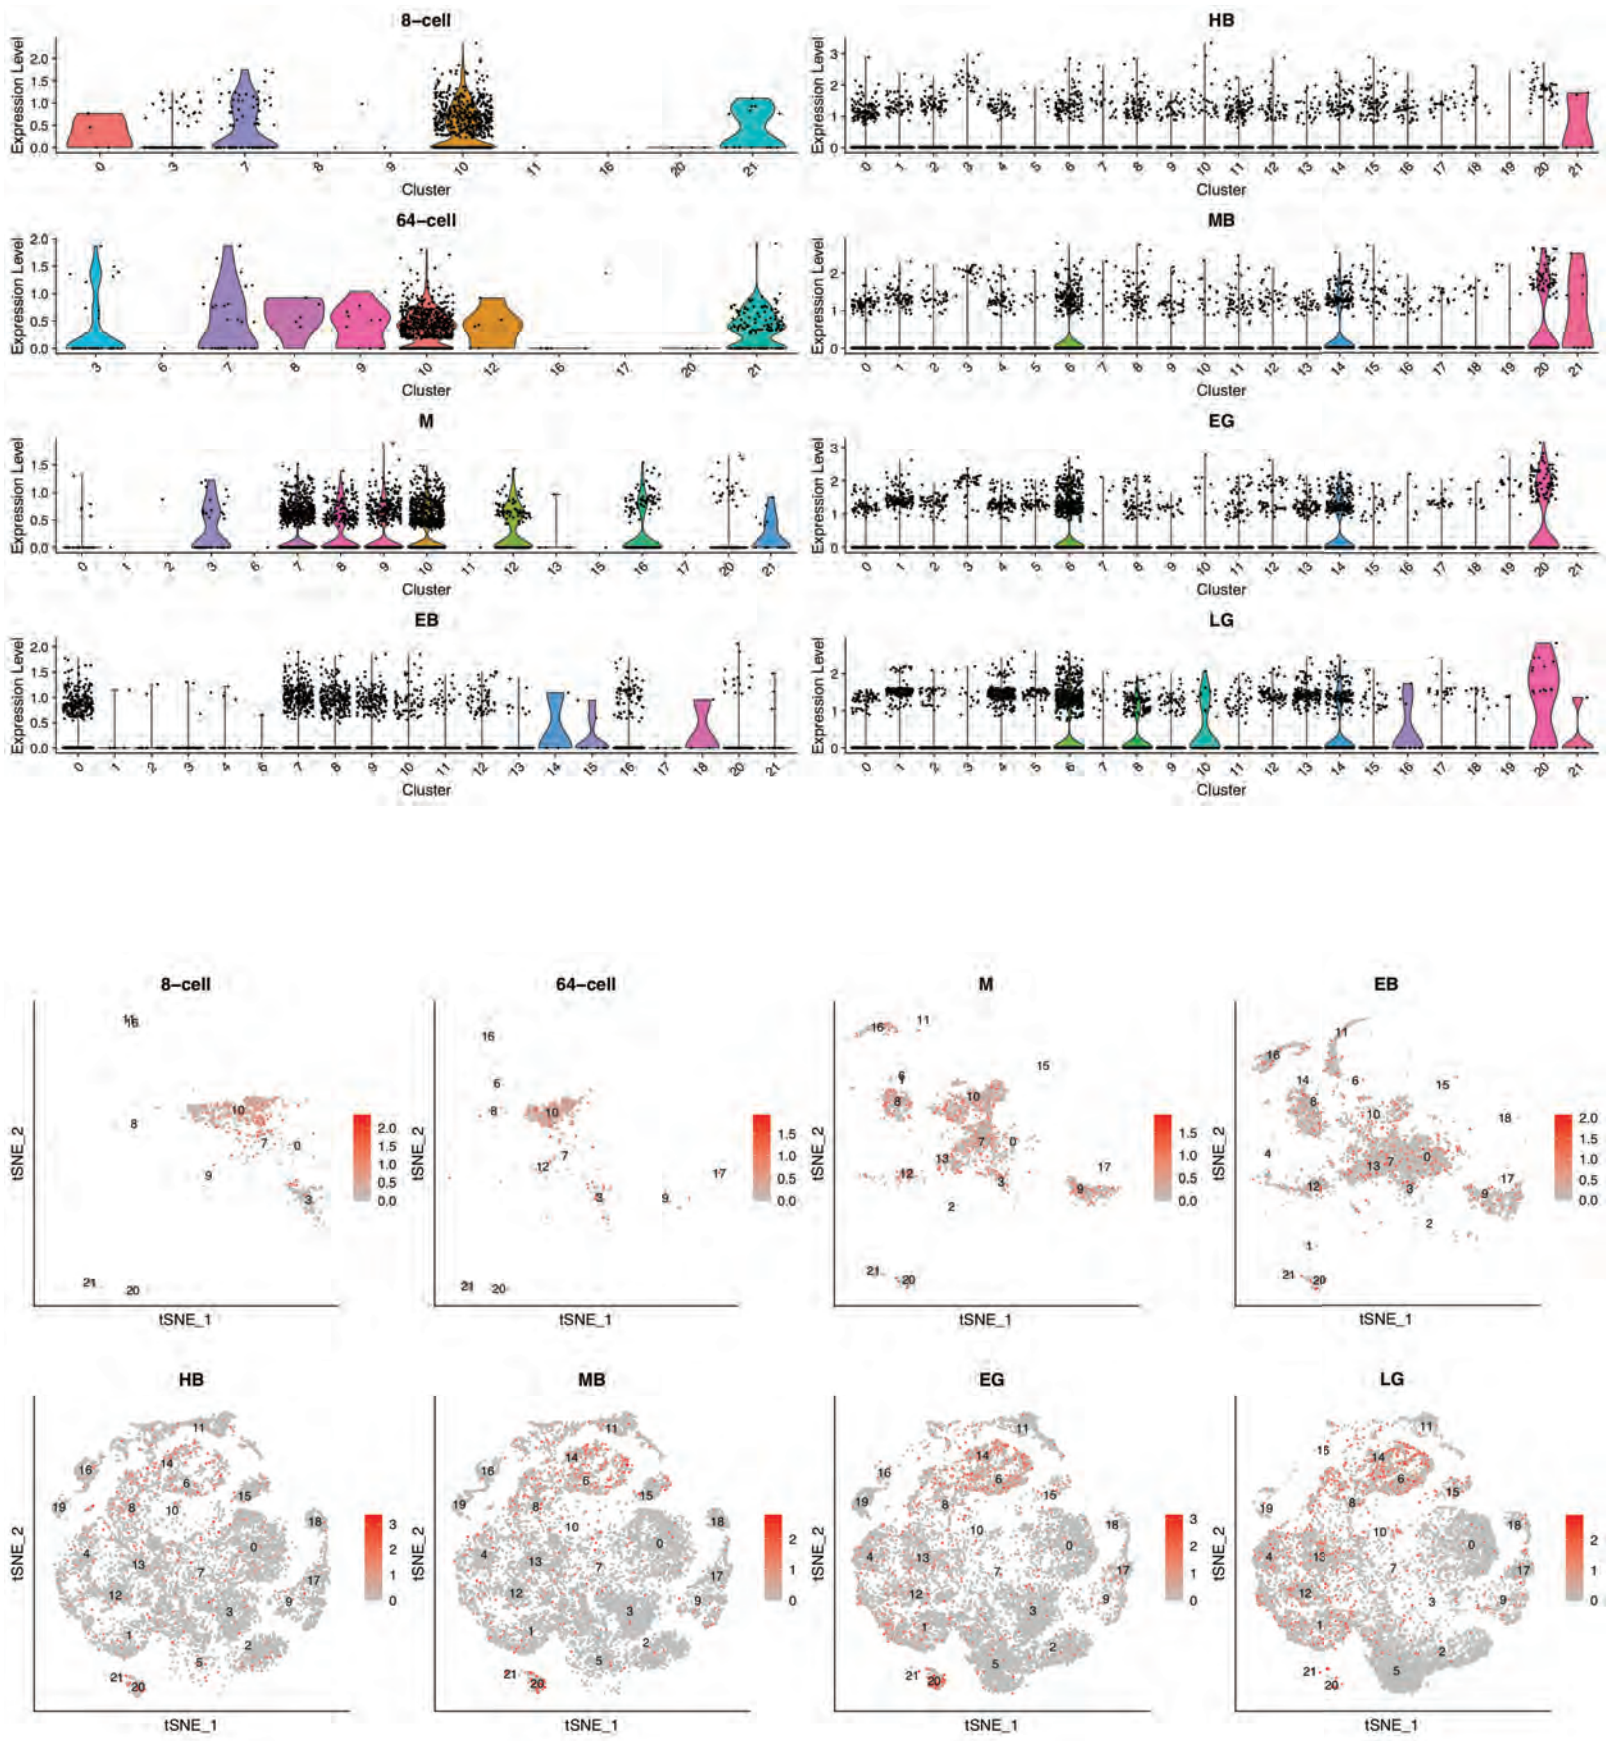



Fig. S15: Seawi

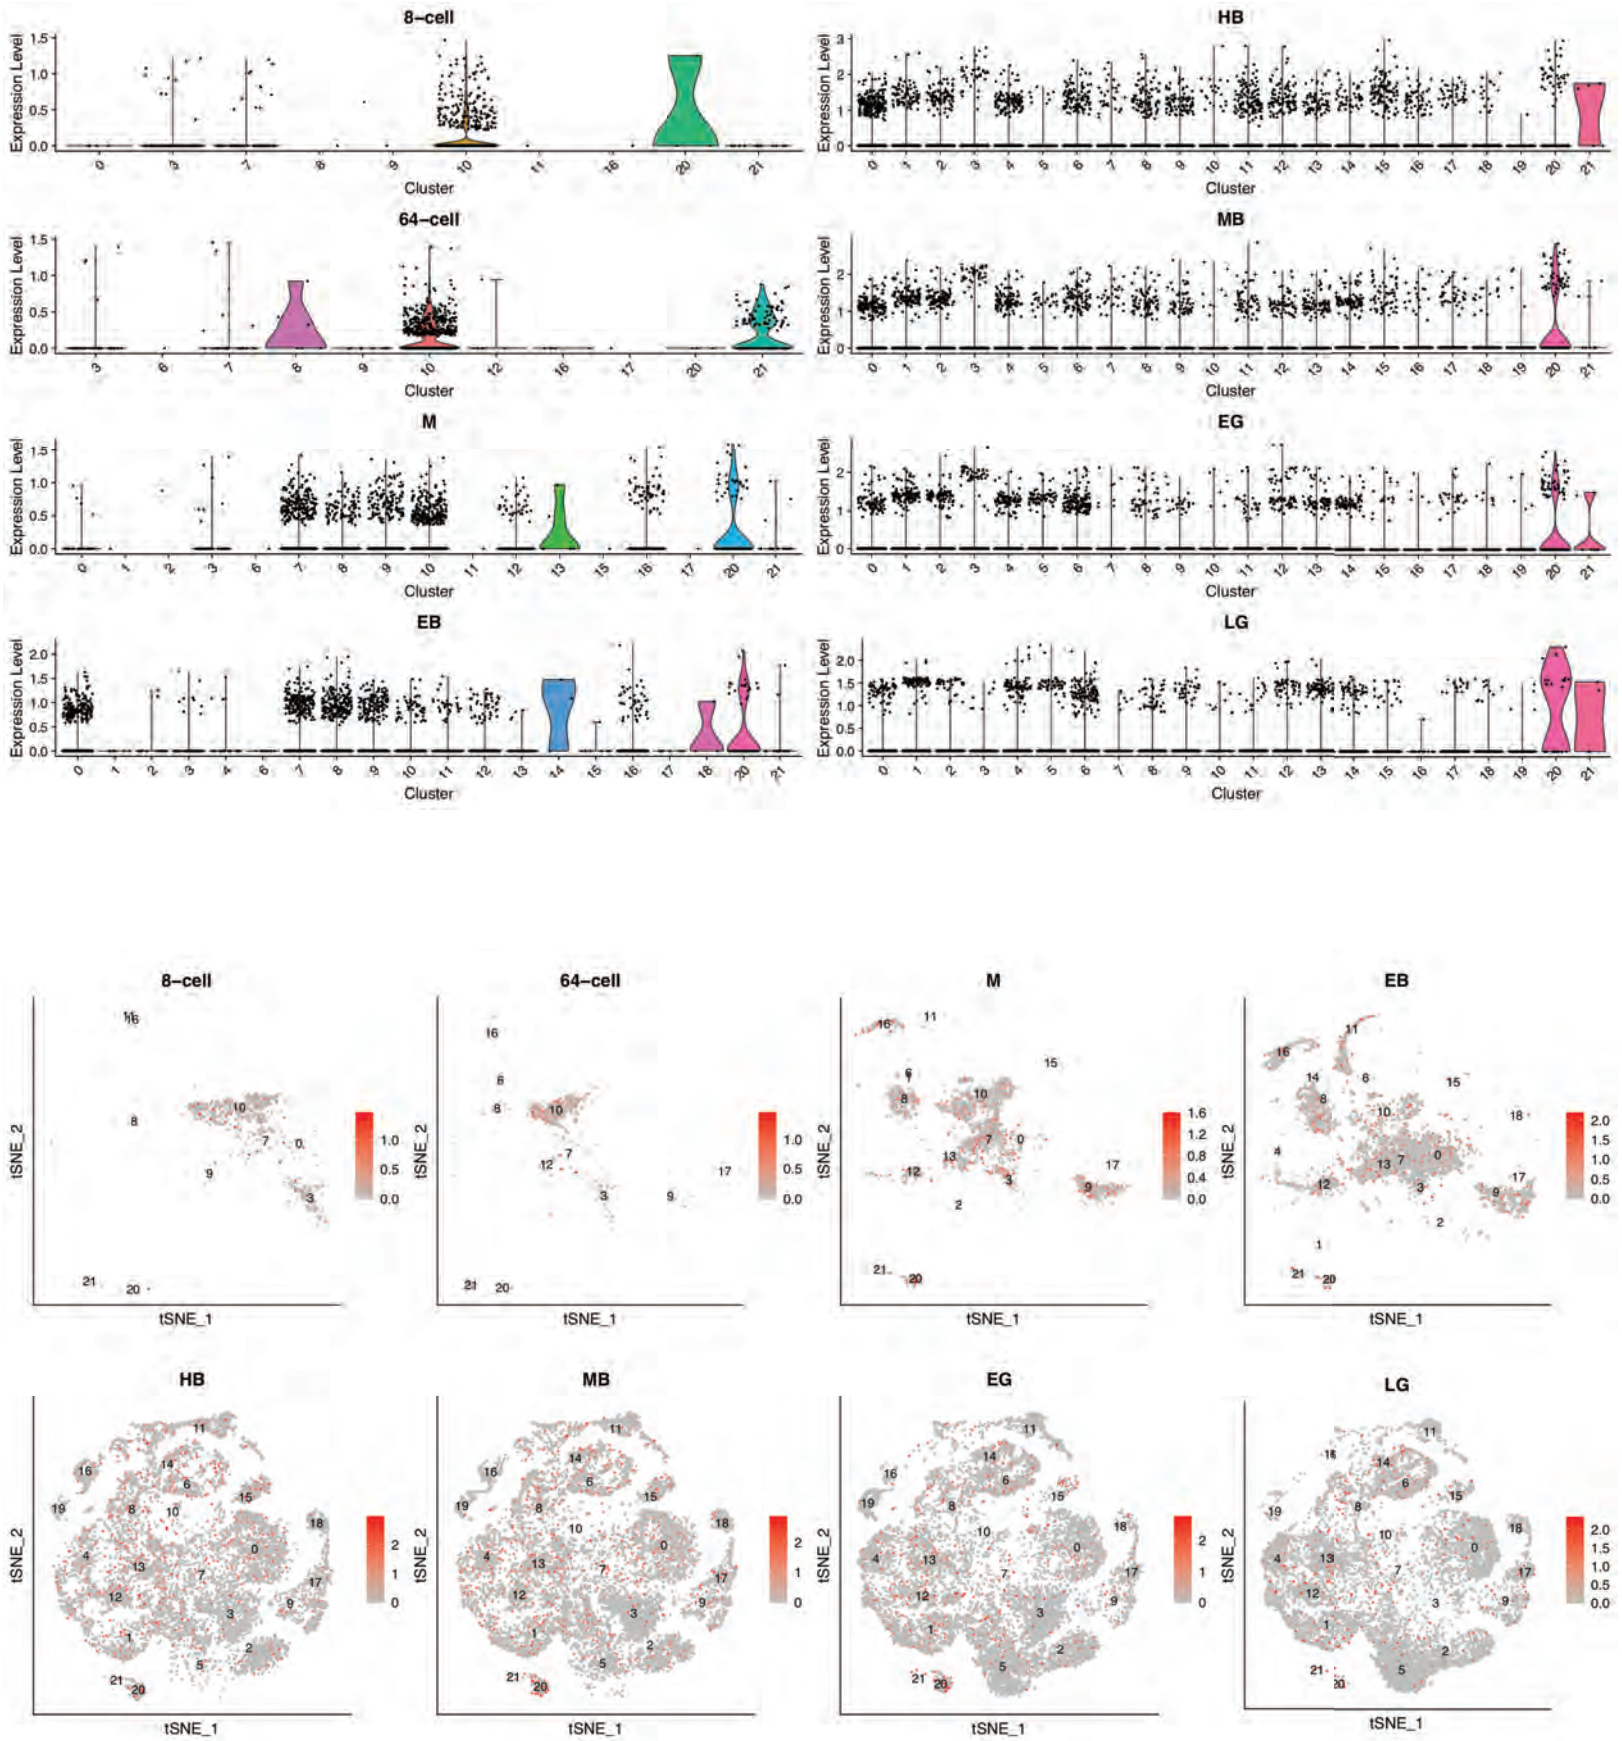

Fig. S16

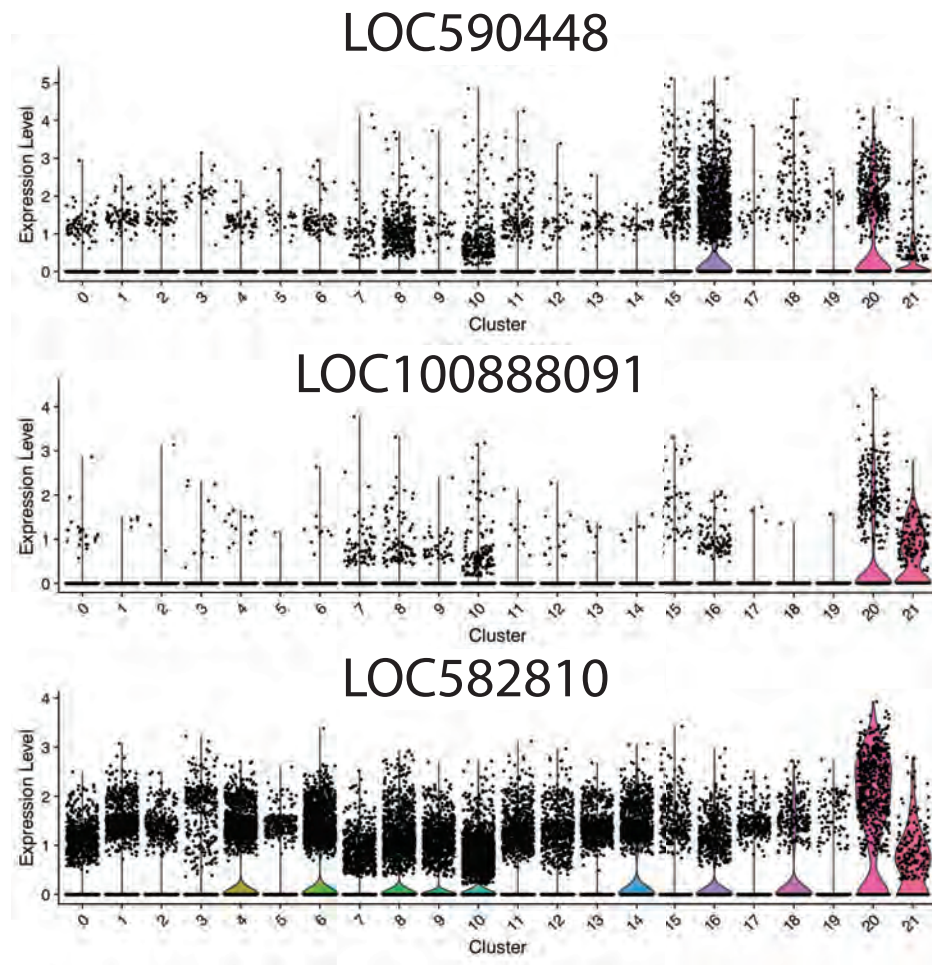

Fig. S16. Violin plots showing enrichment of uncharacterized transcripts in germline cluster 20.



Fig S17: Kruppel

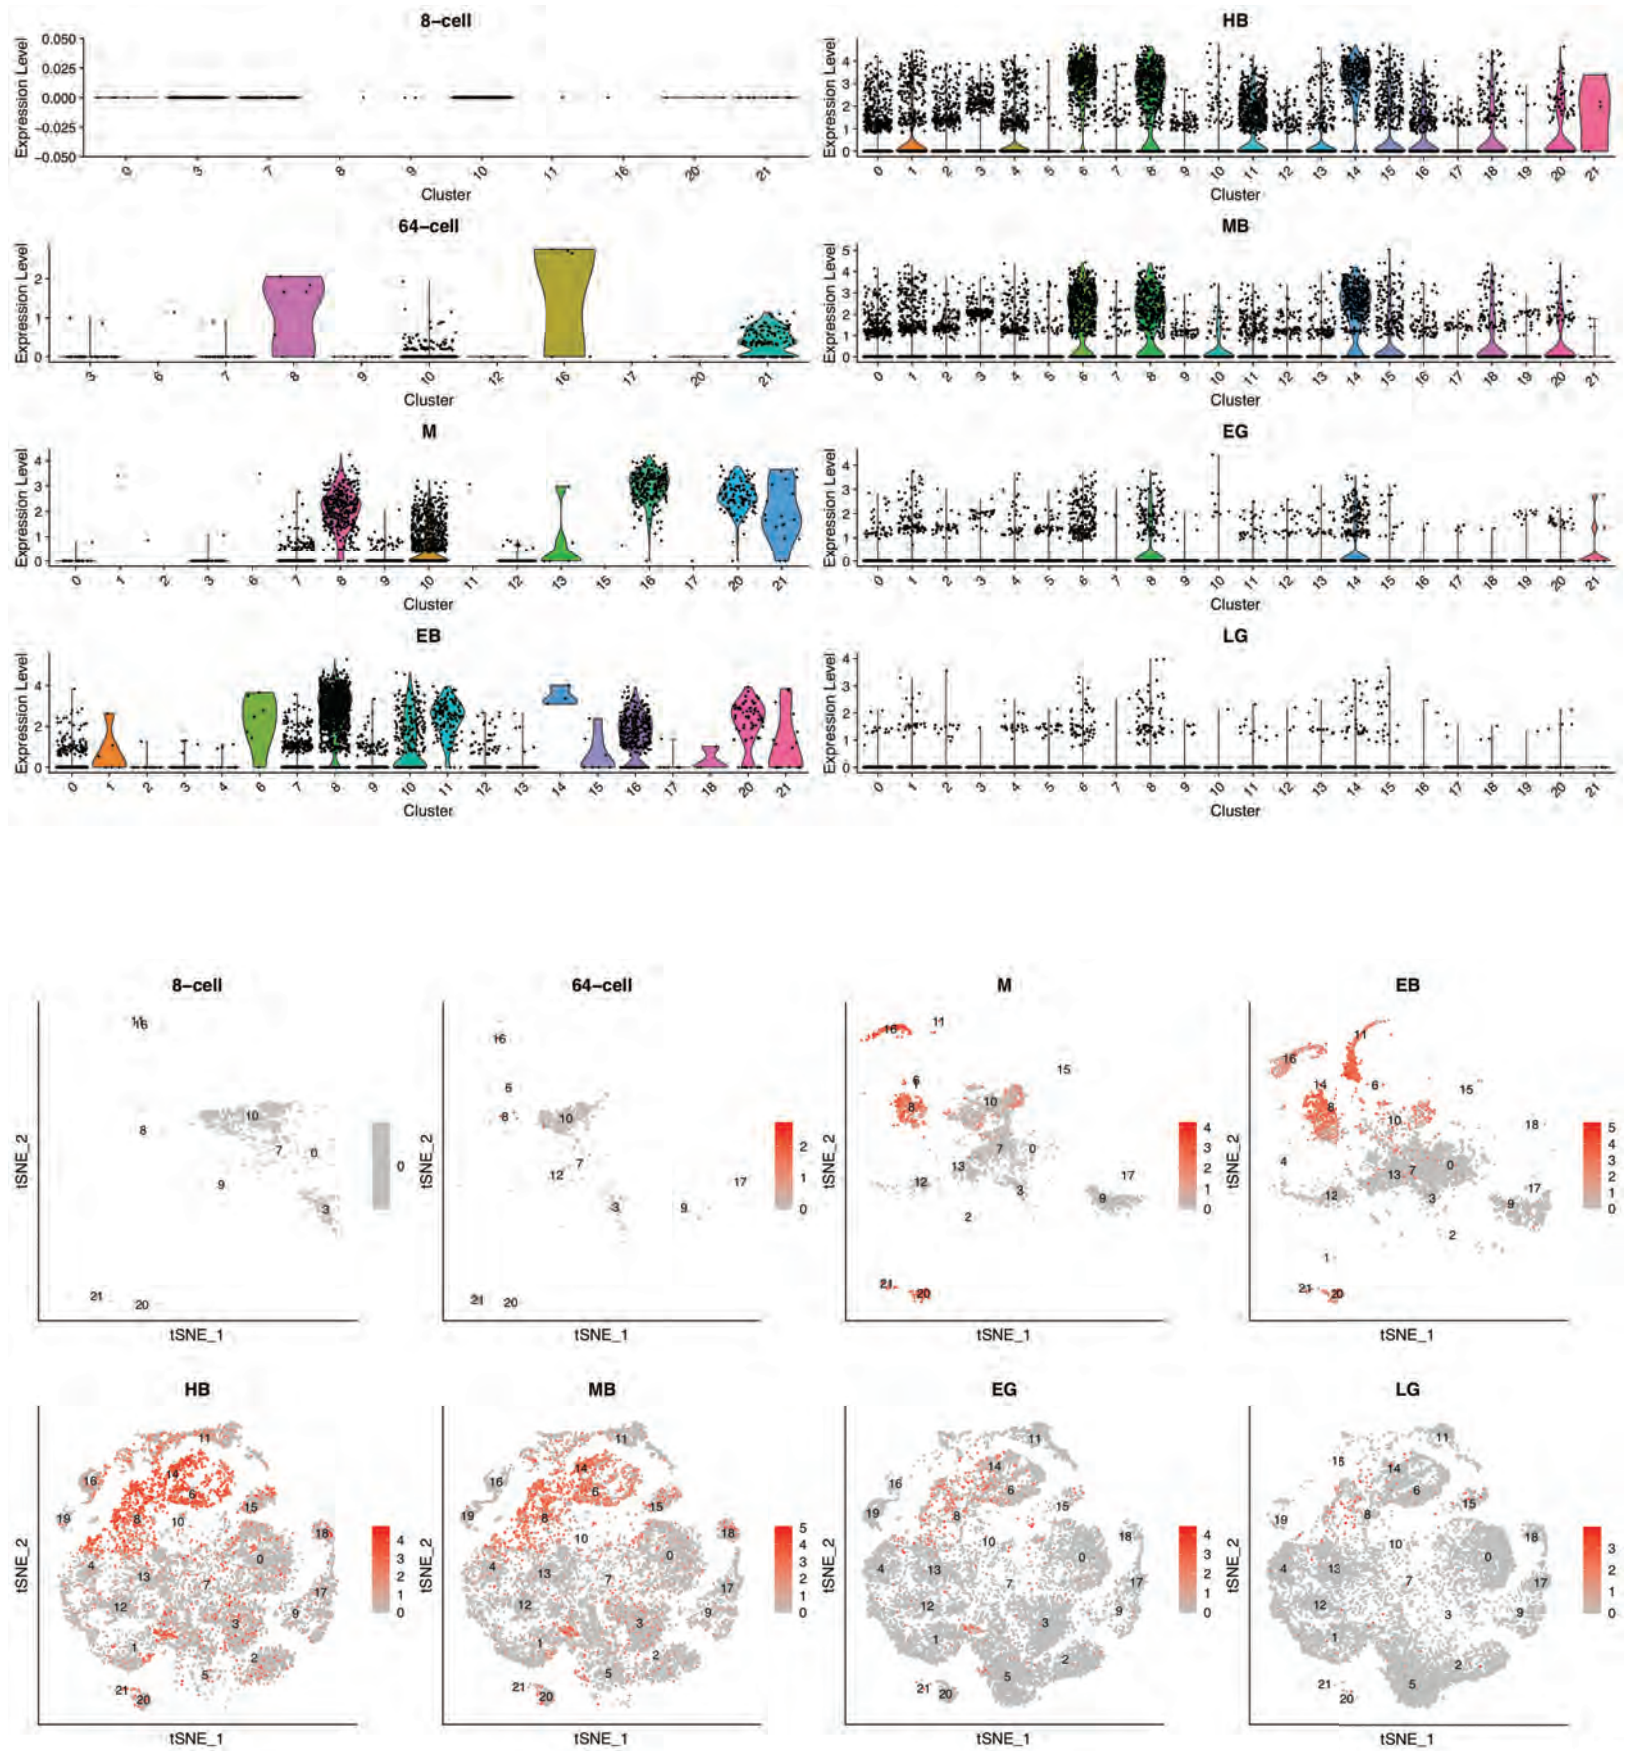



Fig. S18: Odz

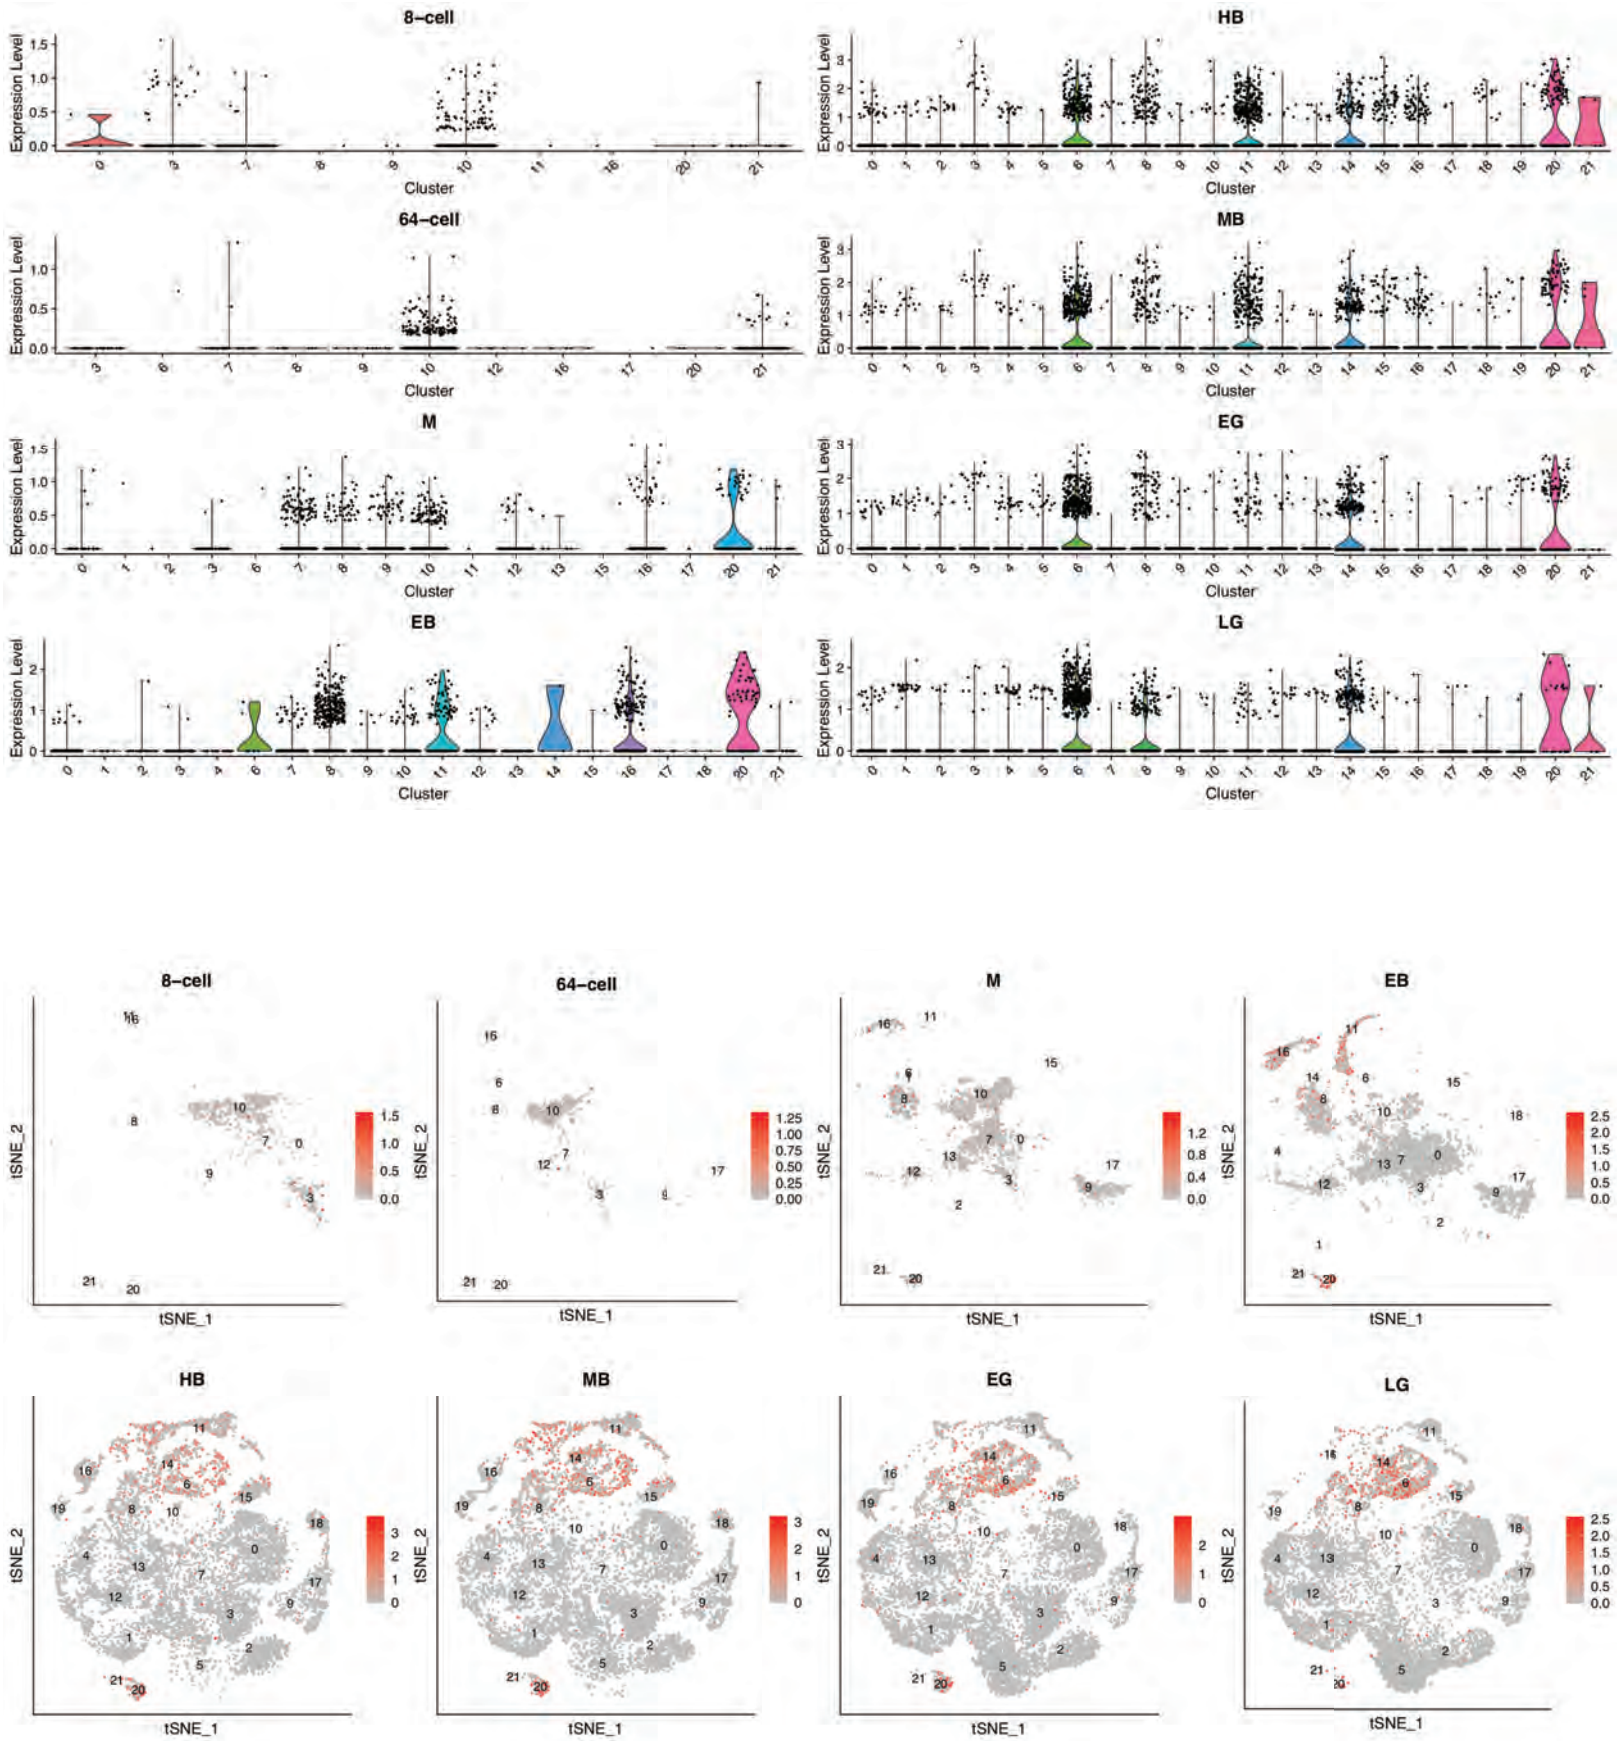



Fig. S19: Stauden

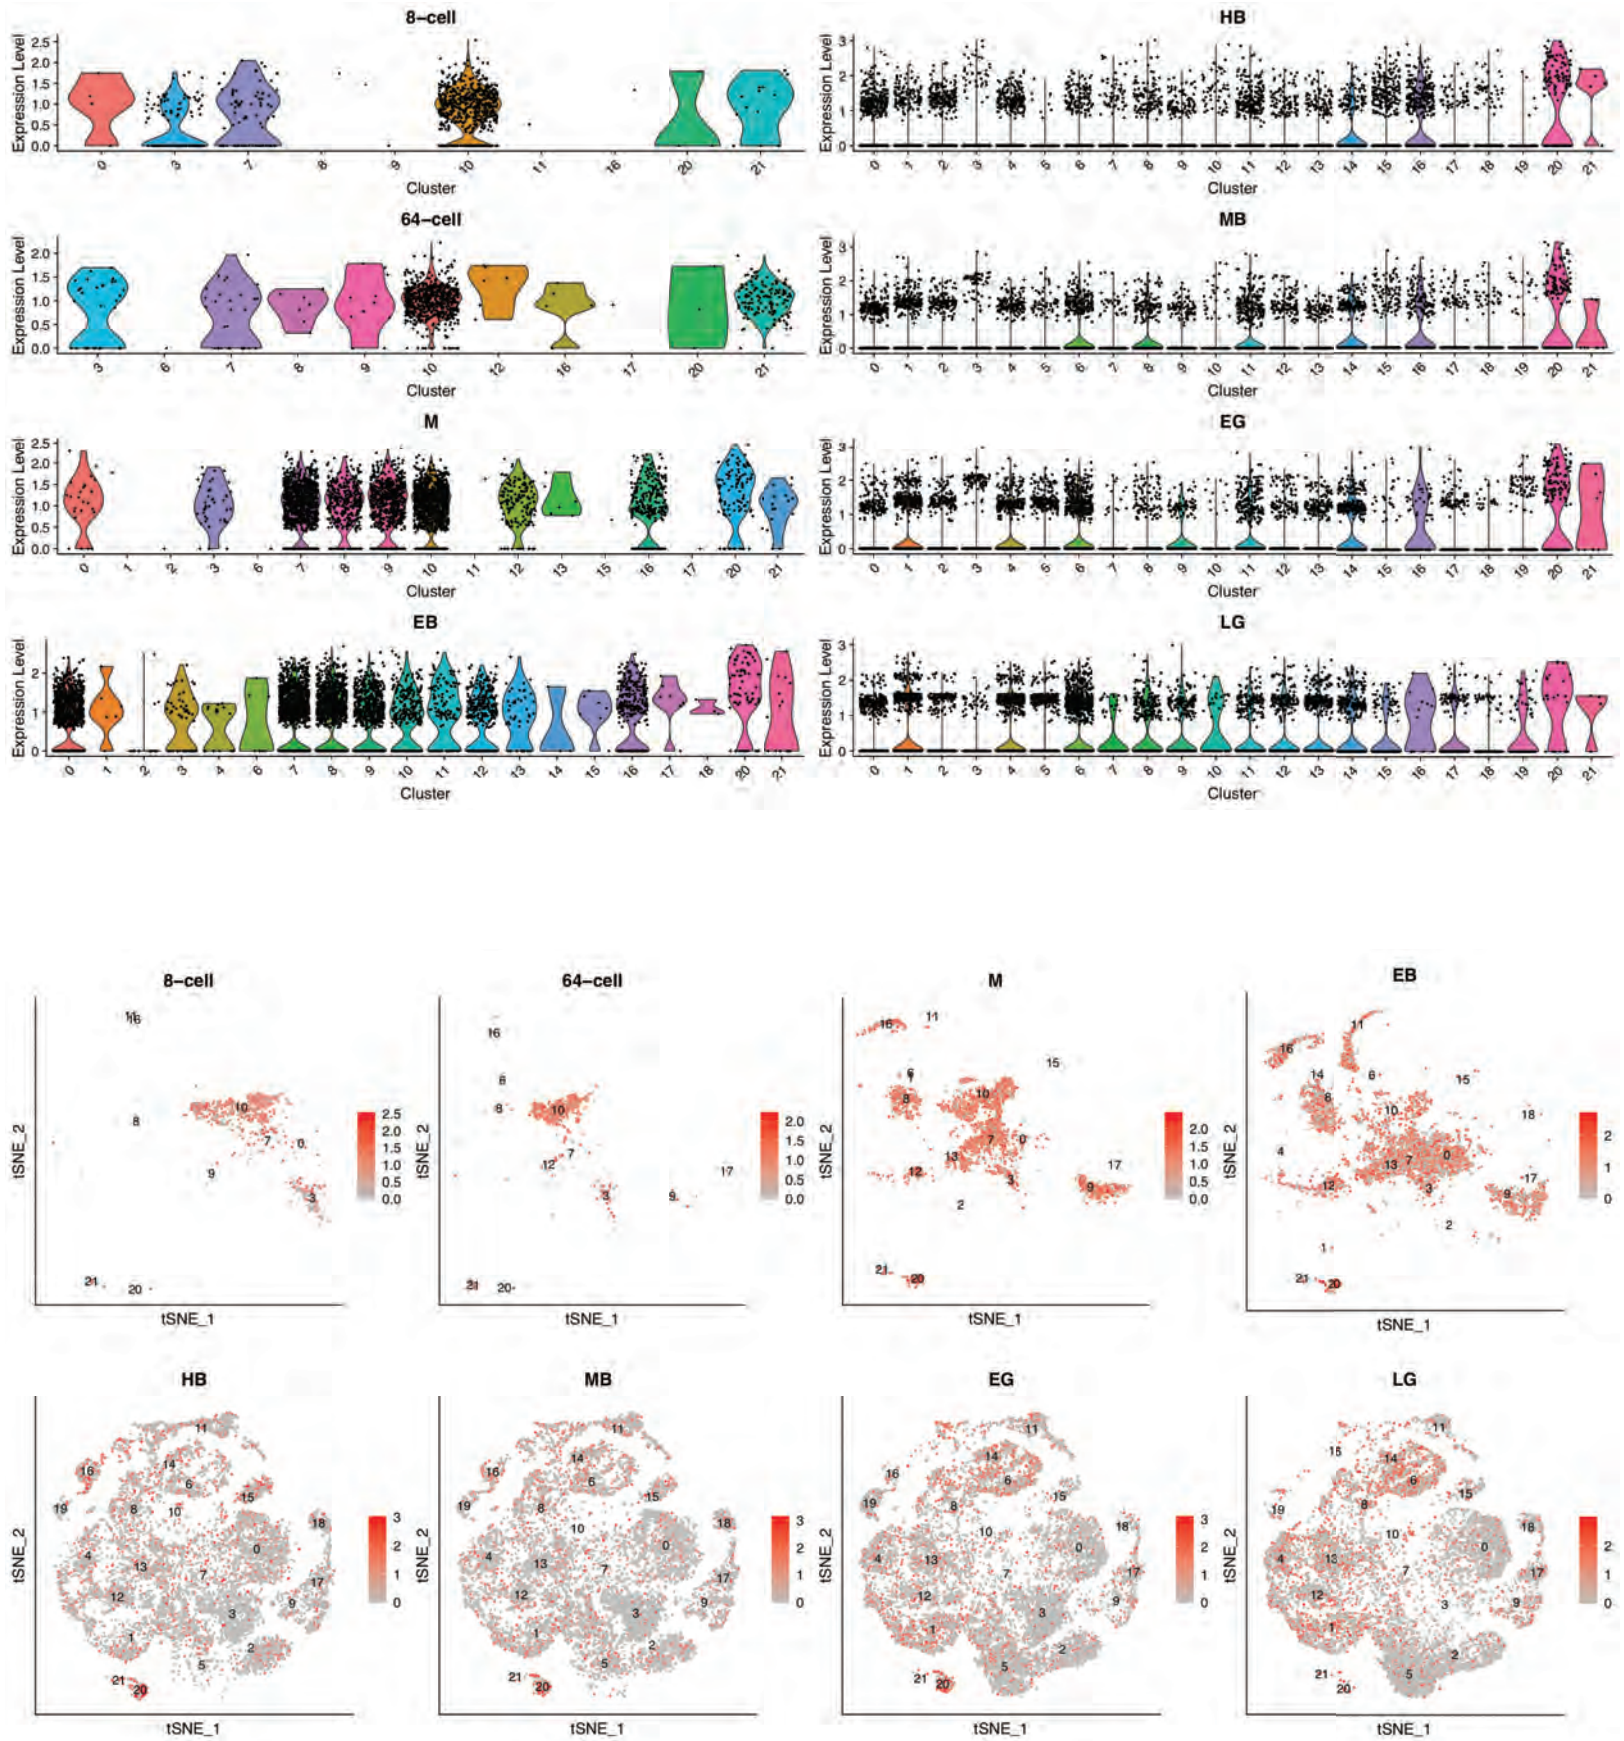







Fig. S21: Gustavus

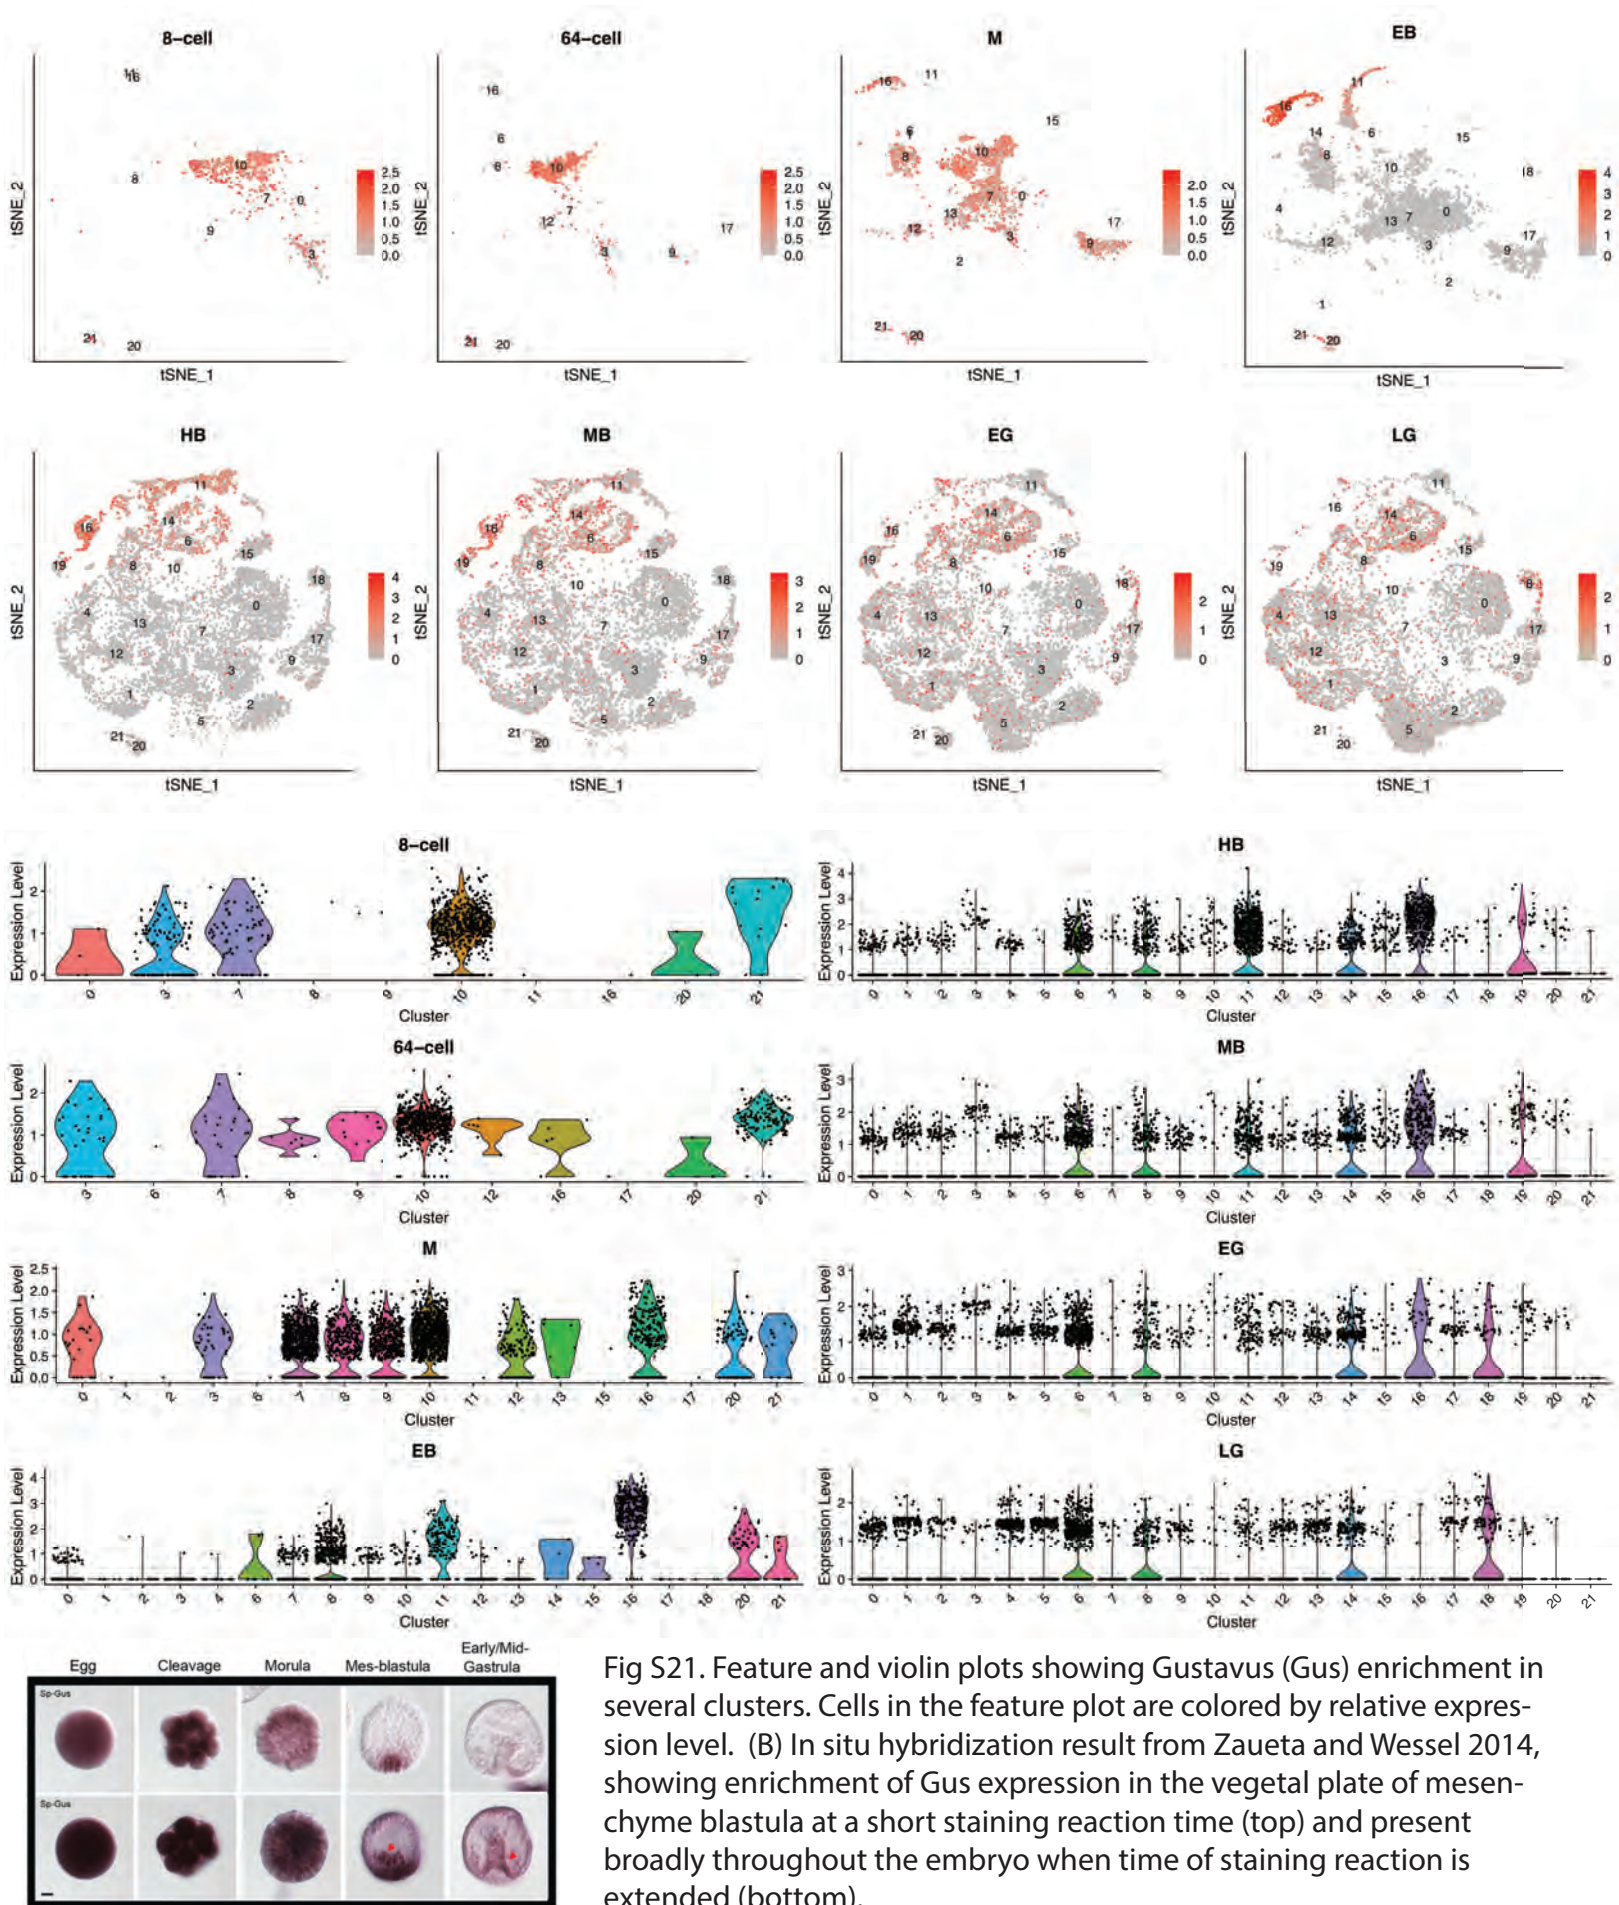

Fig S21. Feature and violin plots showing Gustavus (Gus) enrichment in several clusters. Cells in the feature plot are colored by relative expression level. (B) In situ hybridization result from Zaueta and Wessel 2014, showing enrichment of Gus expression in the vegetal plate of mesenchyme blastula at a short staining reaction time (top) and present broadly throughout the embryo when time of staining reaction is extended (bottom).



Fig. S22: FoxG

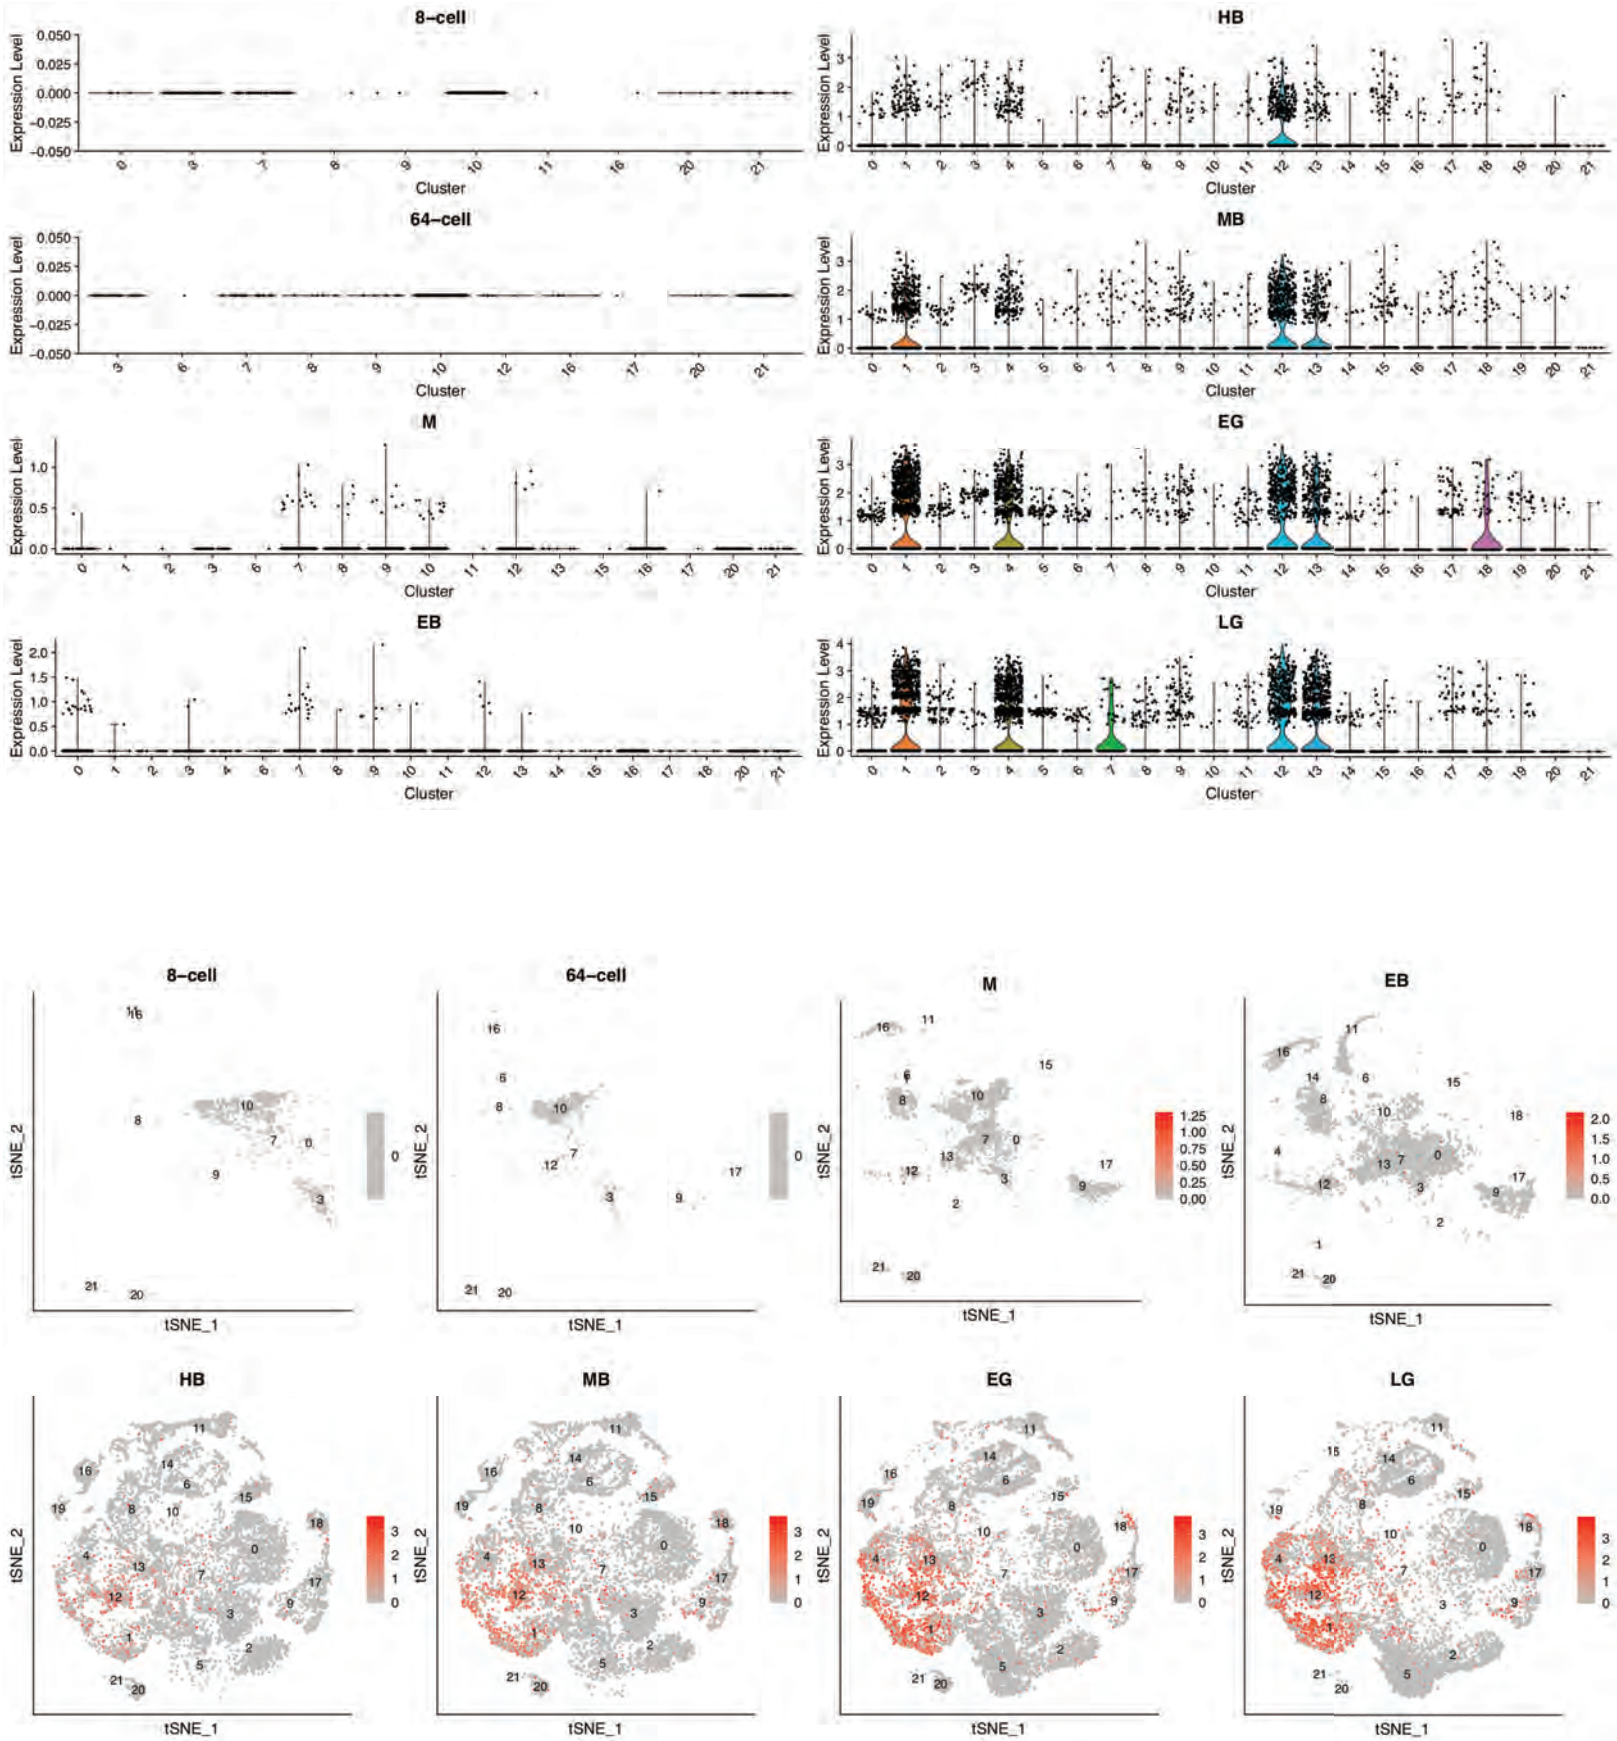



Fig. S23: CHR

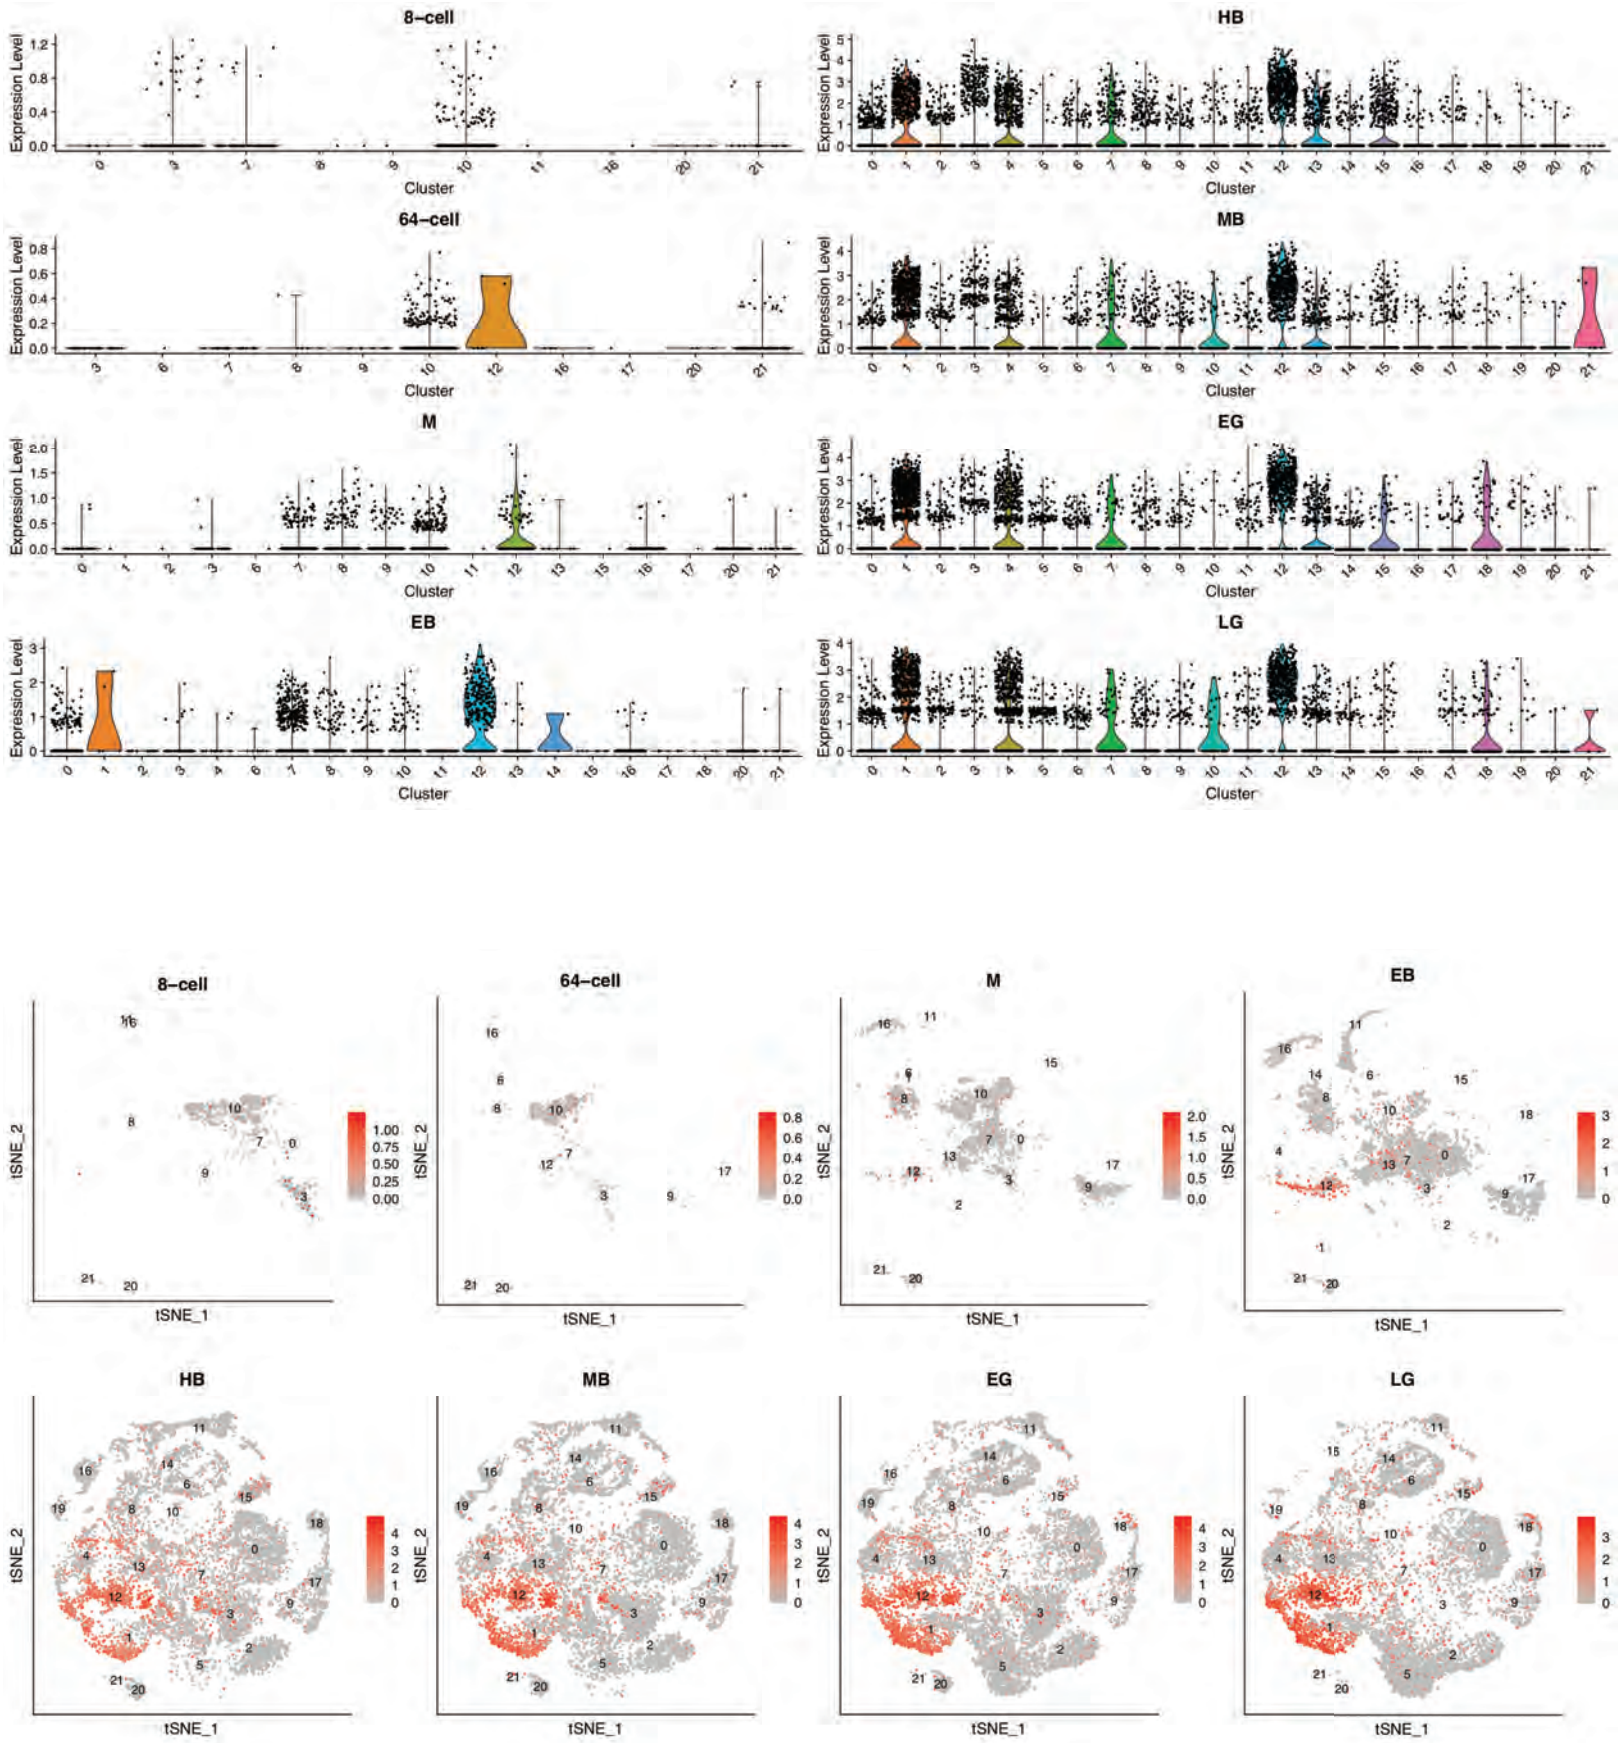



Fig. S24: Lim1

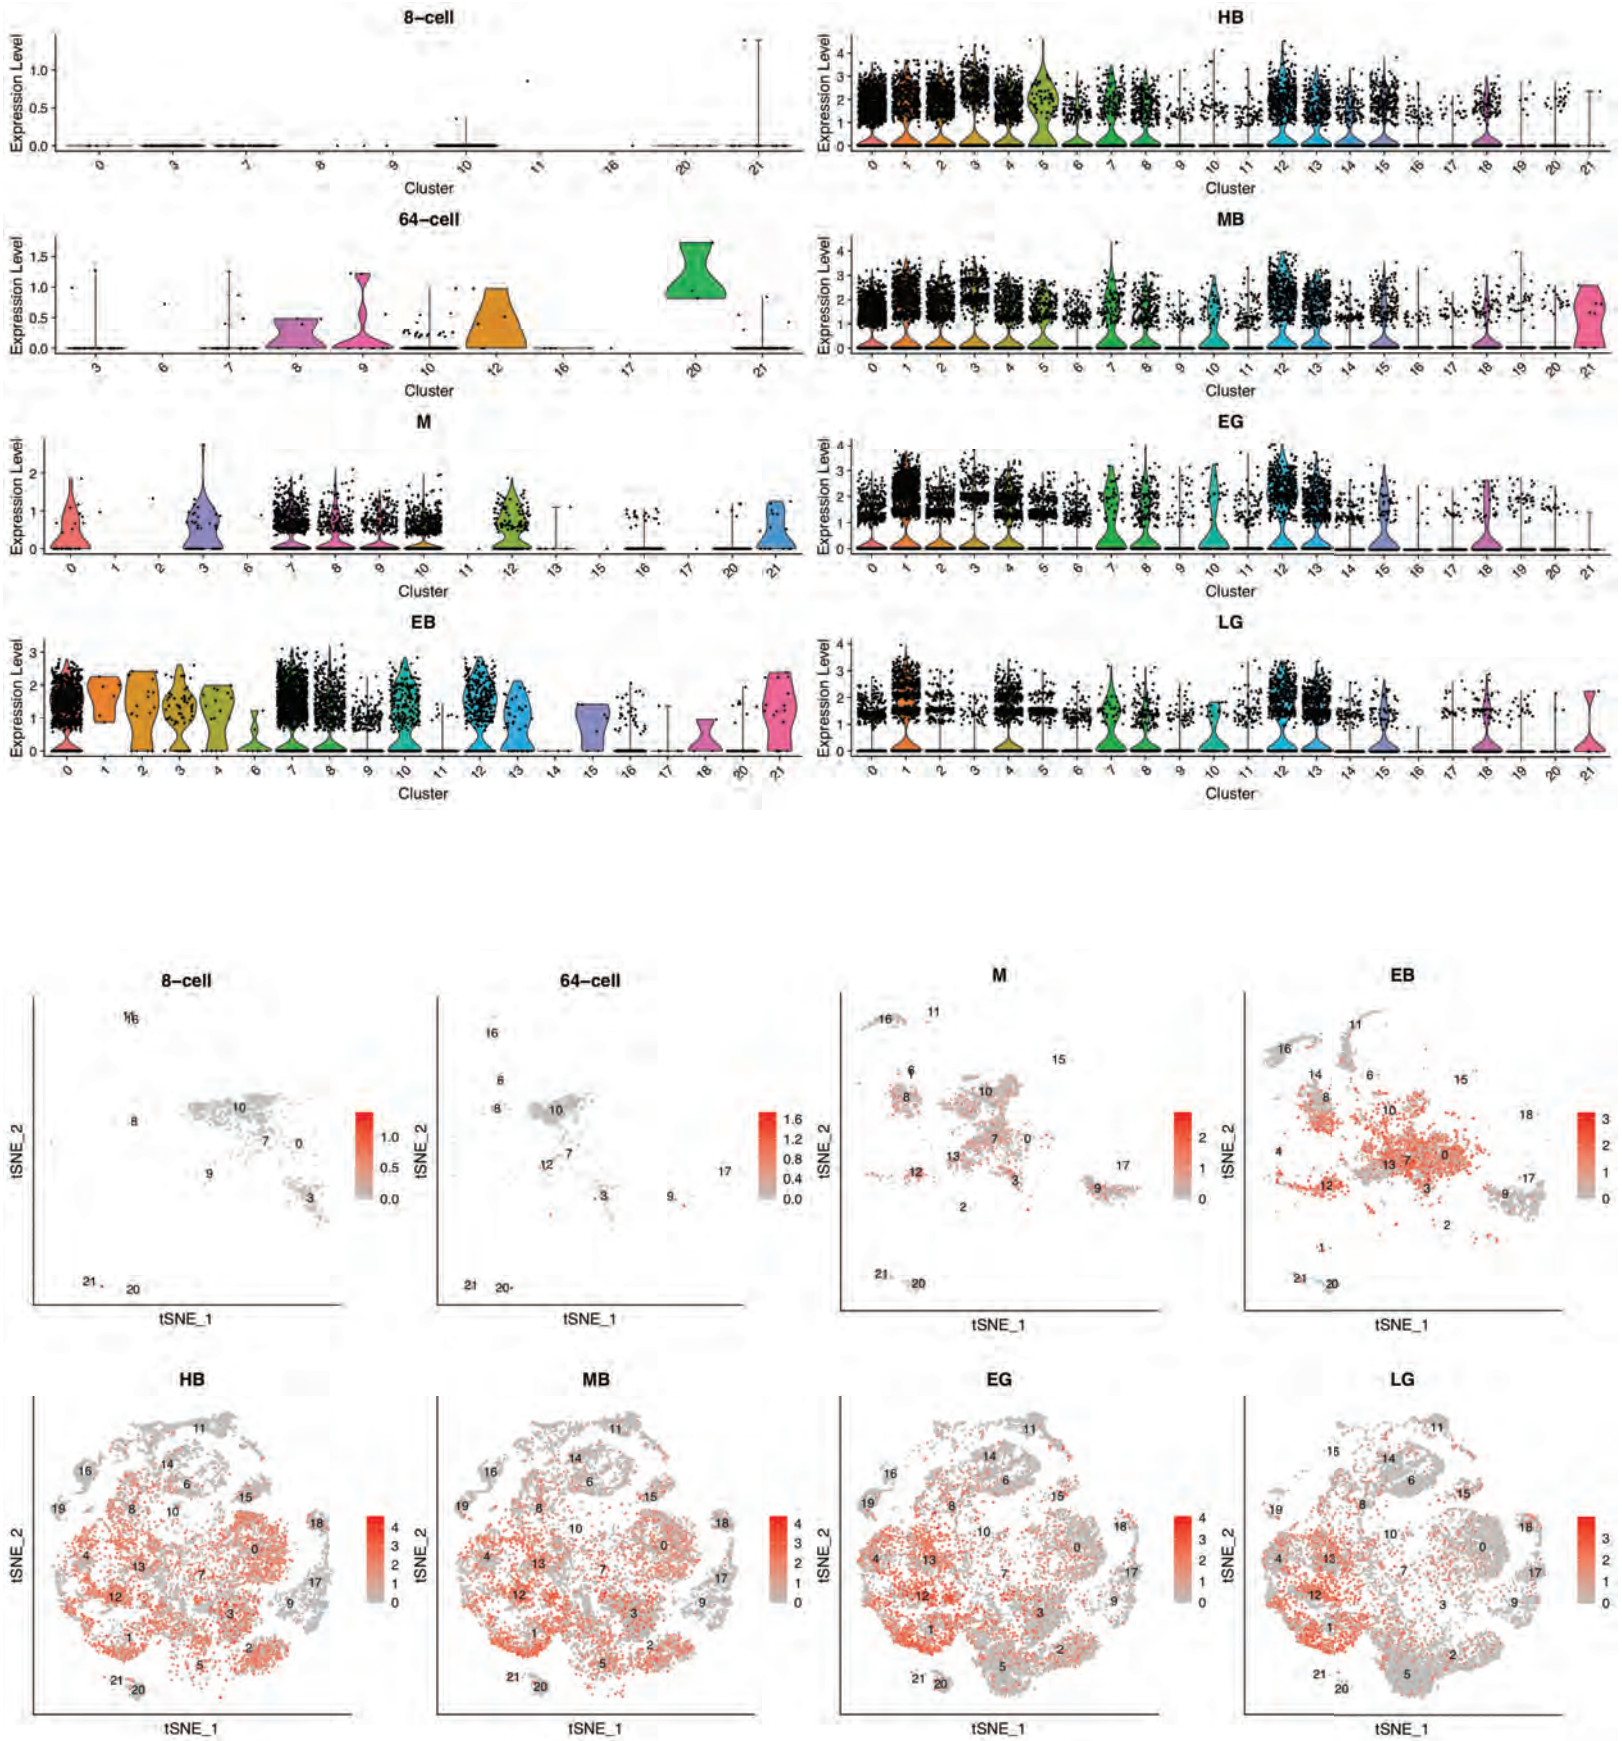



Fig. S25

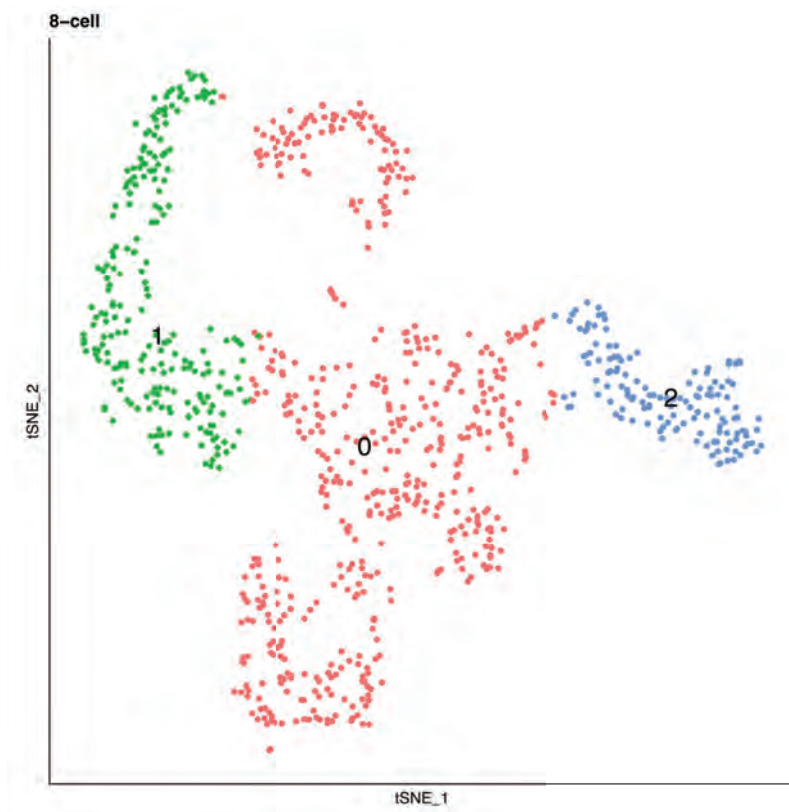

Fig. S25. tSNE plot of 8-cell stage, unintegrated dataset shows the 886 cells cluster into three major cell states. (Clustering parameters used were dims=4, res=0.1.)

## Fig. S26

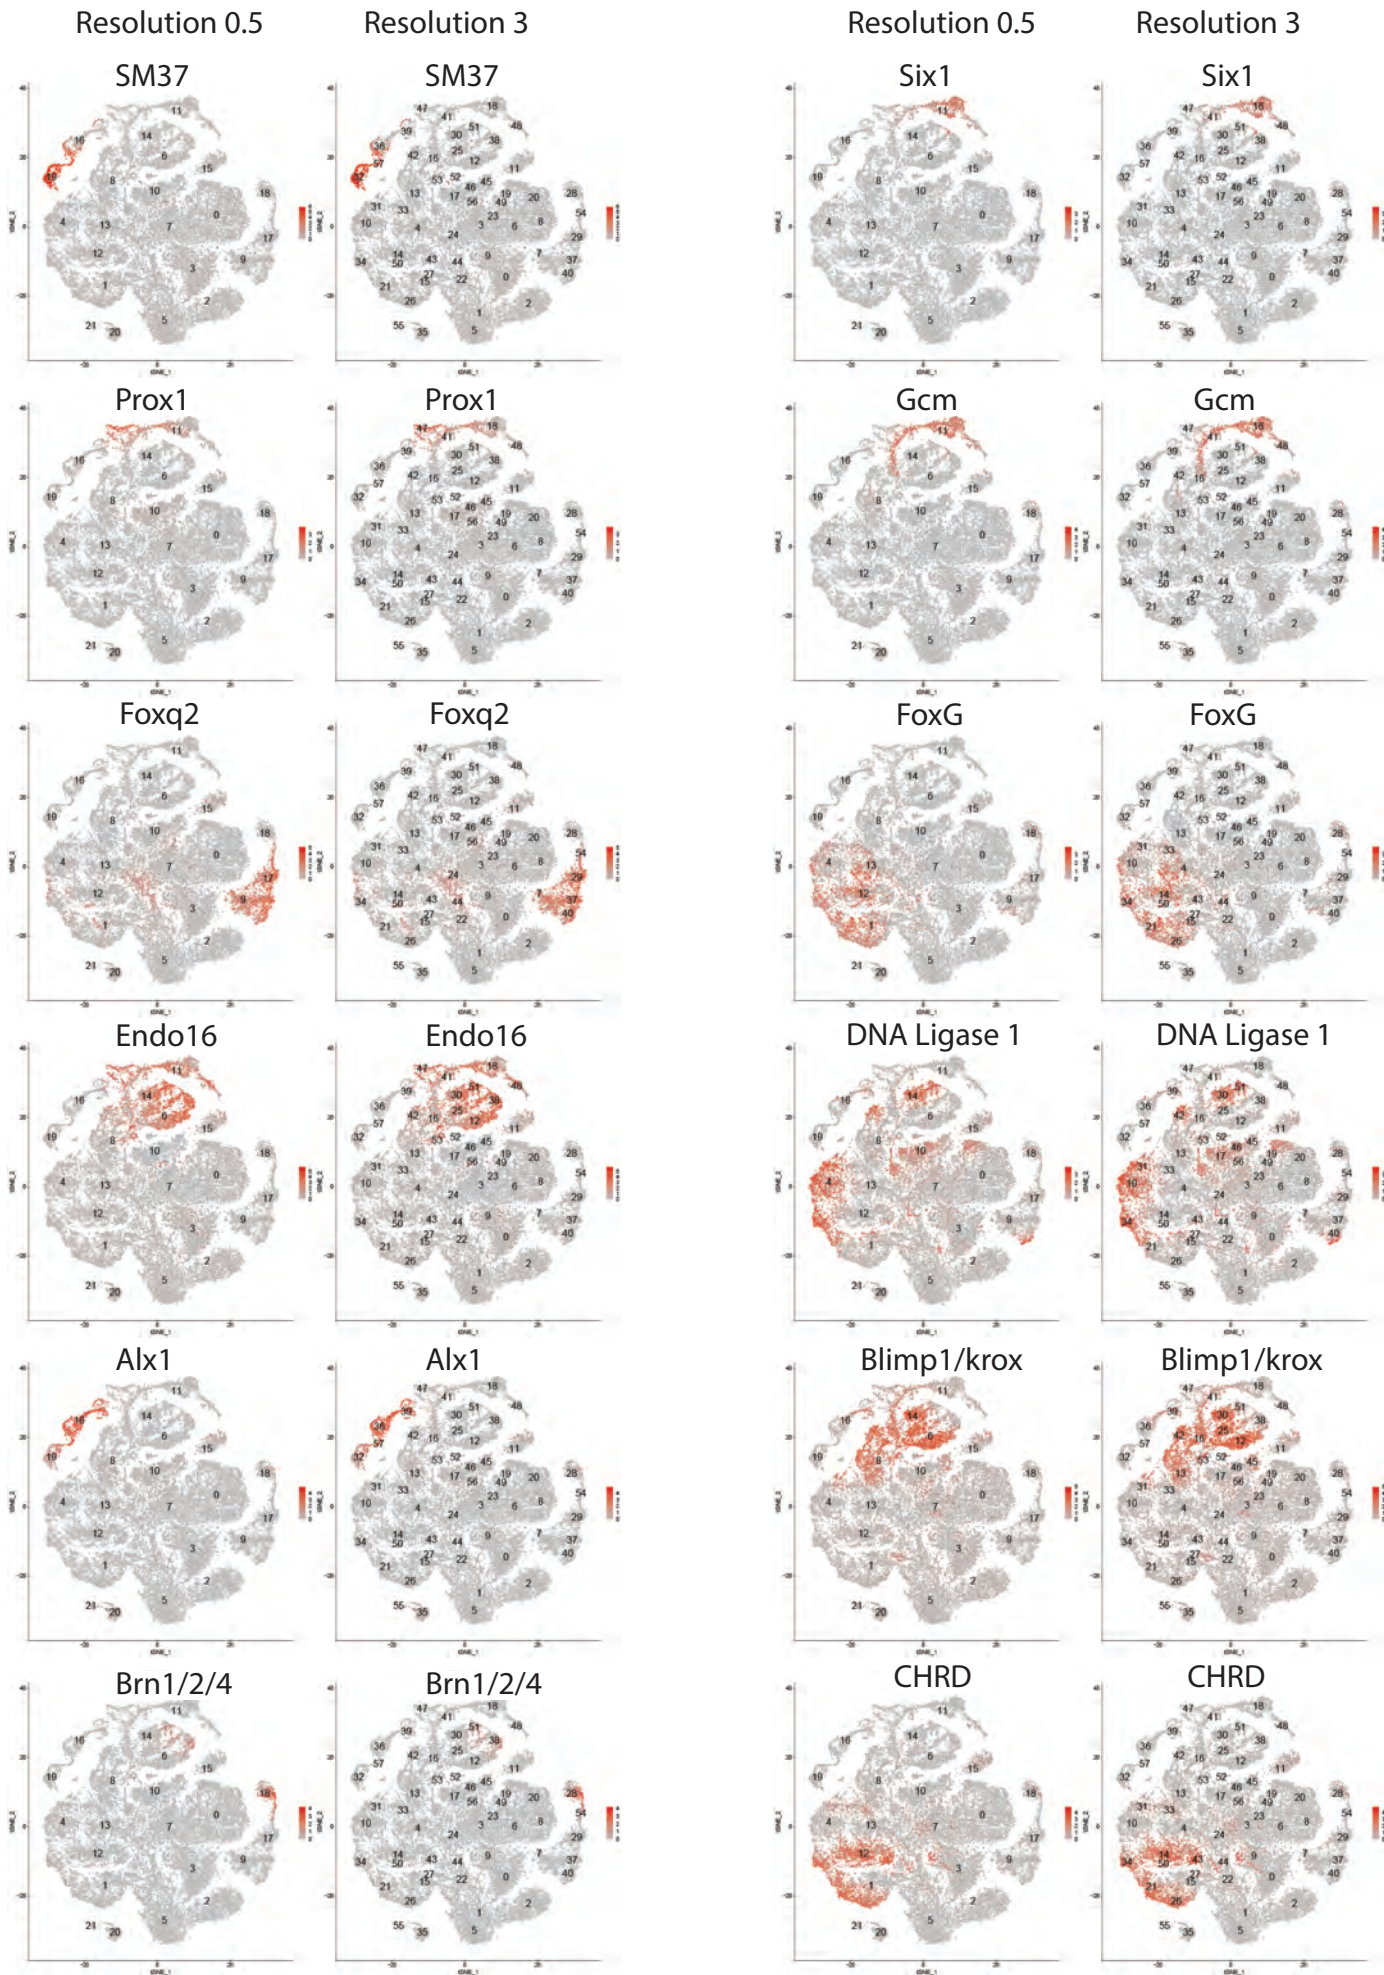

Fig. S26. Feature plots for several marker genes seen at a resolution of 0.5 and 3. Higher resolution differentiates subpopulations of the cell states identified at resolution 0.5. Foregut gene Brn1/2/4 which is seen in some cells of cluster 14 and 6 (res=0.5) is enriched in clusters 51 and 38 (res=3).



Fig. S27: Cyclin B

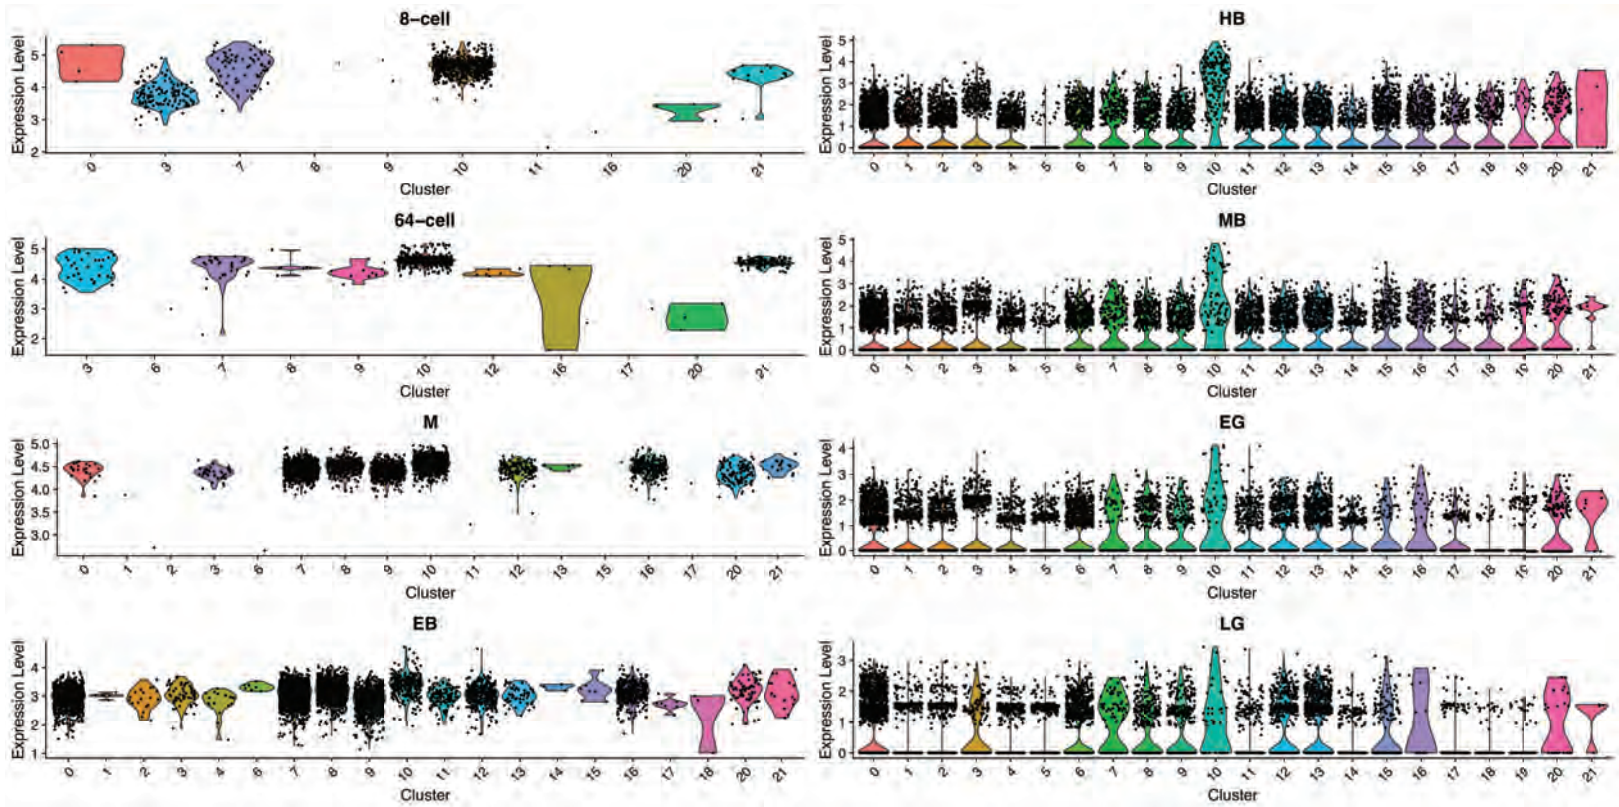

Fig. S27. Violin plots showing Cyclin B expression across different clusters at each developmental stage. Normalized gene expression values at log scale shown per cell cluster identity for each developmental time point. Plots depict probability density at different expression levels.

**Table S1. Cell stages**

| Stage               | Hours post fertilization | Number of cells after QC | Mean reads per cell |        |
|---------------------|--------------------------|--------------------------|---------------------|--------|
|                     |                          |                          | Rep1                | Rep2   |
| 8-cell              | 2.75                     | 886                      | 436,520             | -      |
| 64-cell             | 6.25                     | 876                      | 418,546             | -      |
| Morula              | 7.25                     | 3,582                    | 113,561             | -      |
| Early blastula      | 11.45                    | 5,992                    | 66,552              | -      |
| Hatched blastula    | 12-15                    | 11,729                   | 57,032              | 72,845 |
| Mesenchyme blastula | 18-20                    | 11,741                   | 66,103              | 65,176 |
| Early gastrula      | 24                       | 12,766                   | 59,790              | 65,293 |
| Late gastrula       | 26-28                    | 12,827                   | 68,490              | 57,482 |



**Table S2. Cluster identification**

|    |                                                                                                                                                                                                                         |    |                                                                                                                                          |
|----|-------------------------------------------------------------------------------------------------------------------------------------------------------------------------------------------------------------------------|----|------------------------------------------------------------------------------------------------------------------------------------------|
| 0  | <b>Aboral ectoderm:</b> ARS, spec1, spec2c, NK2.2, Tbx2/3, Klf7                                                                                                                                                         | 11 | <b>Pigment cells:</b> ABCC5a, gcm, Six1, PKS1                                                                                            |
| 1  | <b>Oral ectoderm:</b> CHRD, FoxG, Hes, hnf6, Lim1                                                                                                                                                                       | 12 | <b>Oral ectoderm:</b> CHRD, FoxA, FoxG, HMG1, Nk2.1                                                                                      |
| 2  | <b>Ciliated cells:</b> tektin, cilia and flagella associated proteins                                                                                                                                                   | 13 | <b>Oral ectoderm:</b> FoxG, HMG1, Hes, hnf6, Lim1                                                                                        |
| 3  | <b>Neural:</b> hyalin, ebr1, egf1, glutamate receptor 2, neuronal acetylcholine receptor, synaptotagmin-14, (Hatched Blastula: ebr1, ARS)                                                                               | 14 | <b>Endoderm:</b> blimp1/krox, endo16, FoxA, GataE, vasa                                                                                  |
| 4  | <b>Oral ectoderm:</b> CHRD, FoxG, Hes, hnf6, Lim1, otx                                                                                                                                                                  | 15 | Major vault protein at late gastrula. (Hatched Blastula: Enriched in proteases, SpAn and Hatching enzyme)                                |
| 5  | <b>Aboral ectoderm / neural:</b> glutamate receptor 2, ARS, spec1, spec2c, NK2.2, Klf7                                                                                                                                  | 16 | <b>Skeleton:</b> Alx1, delta, endo16. GataC, SM37, SM50, SM30A, vasa (mesoderm)                                                          |
| 6  | <b>Endoderm:</b> blimp1/krox, endo16, FoxA, GataE, vasa                                                                                                                                                                 | 17 | <b>Neural:</b> Foxq2, AnkAT-1, NK2.1, Hes (animal ectoderm)                                                                              |
| 7  | <b>Ciliated cells:</b> tektin, tubulin, cilia and flagella associated protein                                                                                                                                           | 18 | <b>Neural:</b> Brn1/2/4, SoxC,delta                                                                                                      |
| 8  | <b>Endoderm:</b> blimp1/krox, endo16, eve, FoxA, GATAe, Nk1                                                                                                                                                             | 19 | <b>Skeleton:</b> Alx1, erg, GATAc, SM37, SM50, SM30A (mesoderm)                                                                          |
| 9  | <b>Neural:</b> foxq2, AnkAT-1, NK2.1 (animal ectoderm)                                                                                                                                                                  | 20 | <b>Germline:</b> Nanos                                                                                                                   |
| 10 | Enriched in histone H2A.2.1, cyclin A, cyclin B, tektin 3. (Cell population only abundant at early time points going from 73% of population at 8-cell to 0.37% at late gastrula. Morula stage: eve expression enriched) | 21 | Only four cells at late gastrula. (64-cell stage: PMAR, eve, alx1, ags Morula stage: transient expression of Alx1, transient Blimp, eve) |

Table S3. Morula\_Cluster16

[Click here to download Table S3](#)

Table S4. Morula\_Cluster20

[Click here to download Table S4](#)

Table S5. Morula\_16v20\_DifferentialGeneExpression

[Click here to download Table S5](#)

Table S6. Nanos\_posvneg\_DifferentialGeneExpression

[Click here to download Table S6](#)

Table S7. Cluster 20 Markers

[Click here to download Table S7](#)

Table S8. Differential gene expression in cluster 20 between time points

[Click here to download Table S8](#)

Table S9. Cluster Markers for Analysis at Resolution 0.5

[Click here to download Table S9](#)

Table S10. Cluster Markers for Analysis at Resolution 3

[Click here to download Table S10](#)
